# Supplementary material for: Stress‐Induced Domain Wall Motion in a Ferroelastic Mn3+ Spin Crossover Complex
Source: PubMed Central journal article supplement (PMC7496919; doi:10.1002/anie.202003041), 2020-06-08
Supplement: ANIE-59-13305-s001.pdf [file ANIE-59-13305-s001.pdf]

## Supporting Information

### **Stress-Induced Domain Wall Motion in a Ferroelastic Mn<sup>3+</sup> Spin Crossover Complex**

*Vibe B. Jakobsen, Elzbieta Trzop, Laurence C. Gavin, Emiel Dobbelaar, Shaline Chikara, Xiaxin Ding, Kane Esien, Helge Müller-Bunz, Solveig Felton, Vivien S. Zapf, Eric Collet,\* Michael A. Carpenter,\* and Grace G. Morgan\**

anie\_202003041\_sm\_miscellaneous\_information.pdf  
anie\_202003041\_sm\_Video\_1.mkv  
anie\_202003041\_sm\_Video\_2.avi  
anie\_202003041\_sm\_Video\_3.avi

SUPPORTING INFORMATION

---

**Table of contents****1. Experimental procedures**

|     |                                                                     |    |
|-----|---------------------------------------------------------------------|----|
| 1.1 | Synthesis                                                           | S2 |
| 1.2 | Magnetometry by superconducting quantum interference device (SQUID) | S2 |
| 1.3 | Heat capacity                                                       | S2 |
| 1.4 | Single crystal X-ray diffraction                                    | S2 |
| 1.5 | Resonant ultrasound spectroscopy                                    | S3 |

**2. Magnetometry measurements****3. Single crystal X-ray diffraction**

|     |                                                       |     |
|-----|-------------------------------------------------------|-----|
| 3.1 | Crystal and structure refinement data                 | S9  |
| 3.2 | Crystal structures and packing of complex 1           | S15 |
| 3.3 | Specific intermolecular interactions of complex 1     | S24 |
| 3.4 | Hirshfeld surface mapping                             | S27 |
| 3.5 | Variable temperature single crystal X-ray diffraction | S31 |
| 3.6 | Reconstructed planes and superstructure reflections   | S33 |
| 3.7 | Twin domains                                          | S36 |

**4. Resonant ultrasound spectroscopy**

|     |                                                                 |     |
|-----|-----------------------------------------------------------------|-----|
| 4.1 | Strain analysis from unit cell parameters                       | S37 |
| 4.2 | Correlation of transition points between different measurements | S39 |

**5. Author contributions****6. References**

## SUPPORTING INFORMATION

## 1. Experimental procedures

### 1.1 Synthesis

*Materials:* All chemicals were purchased from Sigma Aldrich. All other reagents were purchased from standard sources and were used as received.

Synthesis of  $[\text{Mn}^{\text{III}}(\text{3,5-diBr-sal}_2\text{(323))}] \text{BPh}_4$ , complex **1**

N,N-bis(aminopropyl)ethylenediamine (0.55 mmol, 0.0962 g) dissolved in 1:1  $\text{CH}_3\text{CN}/\text{EtOH}$  (15 mL), was mixed with 3,5-dibromosalicylaldehyde (1.02 mmol, 0.2842 g) dissolved in 1:1  $\text{CH}_3\text{CN}/\text{EtOH}$  (15 mL) forming a yellow solution. This was allowed to stir for 15 min. Solid manganese(II) nitrate tetrahydrate (0.54 mmol, 0.1351 g) was added to a solution of sodium tetraphenylborate (0.51 mmol, 0.1751 g) in 1:1  $\text{CH}_3\text{CN}/\text{EtOH}$  (10 mL). The two solutions were then mixed, yielding a dark brown solution of the Mn(III) complex resulting from air oxidation of the initial Mn(II) salt. Dark red crystals of complex **1** suitable quality for X-ray diffraction were formed within a day upon slow evaporation of the solvent (337.6 mg, 62%). Large single crystals were obtained by recrystallization from 1:1 DMF/ $\text{CH}_3\text{CN}$  over several weeks. Elemental analysis calcd. (found) (%) for  $\text{C}_{46}\text{H}_{44}\text{BN}_4\text{O}_2\text{MnBr}_4$ : C, 51.62 (51.44); H, 4.14 (4.04); N, 5.23 (5.16). IR (FT-ATR diamond anvil)  $\text{v}/\text{cm}^{-1} = 3236(\text{w}), 1674(\text{w}), 1621(\text{m}), 1576(\text{m}), 1515(\text{w}), 1452(\text{w}), 1421(\text{m}), 1374(\text{m}), 1244(\text{m}), 1183(\text{w}), 1164(\text{w}), 1073(\text{m}), 985(\text{m}), 842(\text{m}), 734(\text{m}), 708(\text{s}), 608(\text{s}), 487(\text{m}), 469(\text{m})$ .

### 1.2 Magnetometry by superconducting quantum interference device (SQUID)

The magnetic susceptibility of complex **1** was measured on a Quantum Design MPMS XL SQUID magnetometer. The magnetic susceptibility was measured twice on the same polycrystalline packed sample. The first measurement was performed to study the spin crossover (SCO) profile and field dependence of the hysteresis loop. The second measurement was more detailed in both regions of the structural phase transitions and was achieved by reducing the temperature intervals from 5 K to 1 K for every data acquisition point. Both measurements were performed over a temperature range of 4 to 300 K in both heating and cooling modes for verification of the hysteretic behaviour of complex **1**.

The first measurement of the magnetic susceptibility was taken in 5 K intervals from 300 K to 4 K in both heating and cooling modes. Field dependence of the hysteresis window centered at 86 K was investigated from 110 K to 70 K at 0.1 T, 1 T and 5 T in cooling and heating modes.

The second measurement was recorded in 5 K intervals from 300 K to 250 K. Intervals of 1 K were used in the temperature range 190-250 K and 5 K intervals were used in the range 95-190 K. Between 75-95 K, 1 K intervals were used for a more precise measurement of the changes close to the first order phase transition below 90 K. 5 K intervals were used in the range 4-75 K. The same temperature intervals were used in heating and cooling modes.

Diamagnetic corrections were calculated for complex **1** using Pascal's constants and applied to all data. The calculated  $\chi_M T$  vs  $T$  data is listed in Table S1 and S2-S3 for the two sets of measurements respectively.

### 1.3 Heat capacity

Heat capacity was measured on a single crystal of complex **1** in a 14 Tesla Quantum Design Physical Properties Measurement System (PPMS) in the range 2-250 K.<sup>[1]</sup> Two methods were employed: the standard relaxation method was used to determine the heat capacity in absolute units over the whole temperature range. The second method, known as the temperature sweep, or long pulse method, was used to determine the heat capacity and the latent heat in the immediate vicinity of the spin crossover transition. In this method, a large heat pulse was applied and the temperature change vs time was monitored while crossing the phase transition.<sup>[1]</sup> The mass of the single crystal of complex **1** was 1 mg  $\pm$  0.03.

### 1.4 Single crystal X-ray diffraction

Single crystal X-ray diffraction (SCXRD) data of complex **1** was collected first at 100 K on a suitable single crystal using an Oxford Supernova X-ray diffractometer (Oxford Instruments, Oxford, United Kingdom) with a micro-source, using a Mo-K $\alpha$  ( $\lambda = 0.71073 \text{ \AA}$ ) radiation, and fitted with an ATLAS detector at the School of Chemistry, University College Dublin, Ireland. A second series of experiments was subsequently completed at Institut de Physique de Rennes, Université de Rennes 1, France, where SCXRD data on a new crystal of complex **1** was collected on an Agilent Technologies SuperNova Single Source X-ray diffractometer with a micro-source, using Cu-K $\alpha$  ( $\lambda = 1.54184 \text{ \AA}$ ) radiation, and fitted with an EosS2 detector. Here, data were taken at 250 K, 150 K, 110 K, 83 K and 25 K for structure determination and, with a change of temperature from 250 K to 83 K (every 2-3° step with 200K/h cooling/heating

## SUPPORTING INFORMATION

rate) to monitor the variations of cell parameters and Bragg peaks intensities. Nitrogen flow 800Plus series cryostat from Oxford Cryosystems was used for the measurements within the temperature range from 266 K to 83 K. Helium flow Oxford Diffraction Helijet Cryostream was used only for the measurement at 25 K. We used the same crystal for both nitrogen and helium environment experiments.

Complex **1** crystallises in the non-centrosymmetric polar space group *Cc* (data at 293 K and 250 K). Below 200 K due to the thermal transition complex **1** undergoes a symmetry change in the crystal to the non-centrosymmetric polar space group *Pc* (data at 150 K and 110 K). An additional thermal transition appears below 95 K to the non-centrosymmetric chiral and polar space group *P1* (data at 83 K and 25 K) and is accompanied by the formation of domains.

CrysAlisPRO<sup>[2]</sup> software package from Rigaku Oxford Diffraction was used for all data collections and data processing (indexing, integration and reduction). Full datasets were collected assuming that the Friedel pairs are not equivalent. This allowed for the sufficient data coverage for non-centrosymmetric crystallographic systems. Data scaling as well absorption corrections were applied during the final data processing. All structures were solved by dual direct methods with *SheXT*<sup>[3]</sup> and refined by full matrix least-squares on  $F^2$  using *SheXL*<sup>[4]</sup> in *OLEX<sup>2</sup> GUI*<sup>[5]</sup>. The structures are all polar. All non-hydrogen atoms were refined anisotropically; H-atoms were constrained by geometry. When applicable, restraints: DFIX, DANG, SADI, SIMU and ISOR, were applied for occupational disorder of  $\text{BPh}_4^-$  anions or Br atom sites. Figure S11 shows the degree of occupational disorder in the  $\text{BPh}_4^-$  anions at various temperatures. For data at 83 K and 25 K, the twin refinement was applied due to formation of domains below 95 K upon thermal phase transition.

Data collection and refinement details are given in Table S4; the bond length and bond angle details are provided in Table S5. The evolution of the bond lengths from 293 K - 83 K is shown in Figure S4 for all three different HT, INT and LT structural phases. Perspective views of the asymmetric unit of the structures measured at 293 K, 250 K, 150 K, 110 K, 83 K and 25 K are provided in Figures S5-S10 with 50% atomic probability distributions for ellipsoids. The disorder of  $\text{BPh}_4^-$  anions in the unit cell for each full data collection is highlighted in Figure S11. Figures S30-S31 show changes of the unit cell parameters with temperature on heating and cooling. Precession images in (hk0) and (0kl) planes were calculated for 250 K, 110 K and 83 K datasets of **1** and are shown respectively in Figure S32-S33.

CCDC-1971455 (293 K), CCDC-1971456 (250 K), CCDC-1971457 (150 K), CCDC-1971458 (110 K), CCDC-1971459 (83 K) and CCDC-1971460 (25 K) contain the crystal data collection and refinement parameters details for this paper, which can be obtained free of charge via [www.ccdc.cam.ac.uk/conts/retrieving.html](http://www.ccdc.cam.ac.uk/conts/retrieving.html) (or from the Cambridge Crystallographic Data Centre, 12 Union Road, Cambridge CB2 1EZ, UK; fax: (+44) 1223-336-033; or [deposit@ccdc.ca.ac.uk](mailto:deposit@ccdc.ca.ac.uk)).

### 1.5 Resonant ultrasound spectroscopy

Resonant ultrasound spectroscopy (RUS) measurements were performed using a custom built design as previously described.<sup>[6]</sup> A single crystal of complex **1** (<1 mm in all directions) was mounted lightly between two piezoelectric transducers in the RUS head which was attached to the end of a stick for lowering into an Oxford Instruments Teslatron PT cryostat. Spectra were collected in the frequency range 100 to 1200 kHz at 5 K intervals from 295 K to 5 K in cooling mode. In heating mode, spectra were collected in the frequency range 100 to 1200 kHz at 5 K intervals from 7 K to 57 K. From 62 K to 102 K, a 2 K interval was employed and from 102 K to 232 K, a 5 K interval was used. From 232 K to 272 K a 2 K interval was used, and from 272 K to 297 K, a 5 K interval was employed. A 15 min settle time at each temperature step was set to allow for thermal equilibration before spectra were collected. All spectra were transferred to the software package IgorPro for analysis. A plot of the spectra (amplitude as a function of frequency) stacked as a function of temperature in small temperature intervals provides an easy way to observe and follow the trends of resonant frequencies as they evolve with temperature. Fits based on an asymmetric Lorentzian function give the values of peak frequencies,  $f$ , and the peak widths at half height,  $\Delta f$ , for selected resonance peaks.  $Q$  scales with the combination of elastic constants which determines each resonance mode. The inverse mechanical quality factor,  $Q^{-1}$  was taken as  $Q^{-1} = (f/\Delta f)^{-1}$  which is a measure of acoustic loss.



## SUPPORTING INFORMATION

## 2. Magnetometry measurements

Table S1. Magnetic data for polycrystalline sample of complex 1 in cooling and heating mode, first measurement

| Cooling mode    |                                                    | Heating Mode    |                                                    |
|-----------------|----------------------------------------------------|-----------------|----------------------------------------------------|
| Temperature (K) | $\chi_{mT}$<br>( $\text{cm}^3 \text{K mol}^{-1}$ ) | Temperature (K) | $\chi_{mT}$<br>( $\text{cm}^3 \text{K mol}^{-1}$ ) |
| 300.02          | 2.5950                                             | 4.00            | 0.9337                                             |
| 294.21          | 2.5974                                             | 10.03           | 1.4056                                             |
| 287.30          | 2.6097                                             | 16.05           | 1.6223                                             |
| 281.27          | 2.6057                                             | 22.12           | 1.7366                                             |
| 275.26          | 2.6108                                             | 28.16           | 1.8057                                             |
| 269.23          | 2.6130                                             | 34.20           | 1.8513                                             |
| 263.20          | 2.6182                                             | 40.24           | 1.8884                                             |
| 257.16          | 2.6240                                             | 46.30           | 1.9211                                             |
| 251.14          | 2.6281                                             | 52.35           | 1.9507                                             |
| 245.11          | 2.6339                                             | 58.42           | 1.9808                                             |
| 239.05          | 2.6367                                             | 64.49           | 2.0099                                             |
| 233.03          | 2.6398                                             | 70.55           | 2.0412                                             |
| 226.99          | 2.6430                                             | 76.61           | 2.0862                                             |
| 221.01          | 2.6504                                             | 82.68           | 2.1323                                             |
| 214.94          | 2.6532                                             | 88.73           | 2.3662                                             |
| 208.89          | 2.6570                                             | 94.81           | 2.7035                                             |
| 202.86          | 2.6624                                             | 100.84          | 2.7101                                             |
| 196.84          | 2.6671                                             | 106.91          | 2.7121                                             |
| 190.80          | 2.6706                                             | 112.98          | 2.7117                                             |
| 184.78          | 2.6781                                             | 119.07          | 2.7130                                             |
| 178.74          | 2.6813                                             | 125.12          | 2.7098                                             |
| 172.71          | 2.6864                                             | 131.19          | 2.7086                                             |
| 166.69          | 2.6881                                             | 137.17          | 2.7041                                             |
| 160.66          | 2.6922                                             | 143.28          | 2.7004                                             |
| 154.60          | 2.6944                                             | 149.31          | 2.7000                                             |
| 148.60          | 2.6994                                             | 155.36          | 2.6960                                             |
| 142.55          | 2.7023                                             | 161.44          | 2.6926                                             |
| 136.52          | 2.7080                                             | 167.50          | 2.6905                                             |
| 130.49          | 2.7101                                             | 173.55          | 2.6865                                             |
| 124.47          | 2.7126                                             | 179.61          | 2.6799                                             |
| 118.45          | 2.7160                                             | 185.67          | 2.6718                                             |
| 112.45          | 2.7165                                             | 191.72          | 2.6722                                             |
| 106.48          | 2.7162                                             | 197.77          | 2.6700                                             |
| 100.47          | 2.7192                                             | 203.82          | 2.6640                                             |
| 94.56           | 2.7135                                             | 209.86          | 2.6578                                             |
| 88.63           | 2.6808                                             | 215.92          | 2.6517                                             |
| 82.62           | 2.3527                                             | 221.99          | 2.6520                                             |
| 76.58           | 2.1223                                             | 228.03          | 2.6477                                             |
| 70.52           | 2.0495                                             | 234.09          | 2.6399                                             |
| 64.51           | 2.0132                                             | 240.13          | 2.6342                                             |
| 58.45           | 1.9822                                             | 246.18          | 2.6305                                             |
| 52.38           | 1.9521                                             | 252.23          | 2.6269                                             |
| 46.30           | 1.9205                                             | 258.28          | 2.6238                                             |
| 40.24           | 1.8868                                             | 264.35          | 2.6157                                             |
| 34.19           | 1.8498                                             | 270.37          | 2.6151                                             |
| 28.15           | 1.8064                                             | 276.42          | 2.6099                                             |
| 22.12           | 1.7389                                             | 282.47          | 2.6087                                             |
| 16.08           | 1.6225                                             | 288.49          | 2.6074                                             |
| 10.07           | 1.4034                                             | 294.52          | 2.6028                                             |
| 4.00            | 0.9336                                             | 300.57          | 2.6029                                             |

## SUPPORTING INFORMATION

**Table S2.** Magnetic data for polycrystalline sample of complex **1** in cooling mode, second measurement

| Cooling mode    |                                                      |                 |                                                      |                 |                                                      |
|-----------------|------------------------------------------------------|-----------------|------------------------------------------------------|-----------------|------------------------------------------------------|
| Temperature (K) | $\chi_M T$<br>(cm <sup>3</sup> K mol <sup>-1</sup> ) | Temperature (K) | $\chi_M T$<br>(cm <sup>3</sup> K mol <sup>-1</sup> ) | Temperature (K) | $\chi_M T$<br>(cm <sup>3</sup> K mol <sup>-1</sup> ) |
| 300.0471        | 2.4845                                               | 218.7341        | 2.5795                                               | 129.6693        | 2.6790                                               |
| 294.1975        | 2.4911                                               | 217.7340        | 2.5795                                               | 124.6971        | 2.6858                                               |
| 289.5586        | 2.4960                                               | 216.7296        | 2.5811                                               | 119.7176        | 2.6943                                               |
| 284.4989        | 2.4997                                               | 215.7408        | 2.5829                                               | 114.7664        | 2.6988                                               |
| 279.4918        | 2.5027                                               | 214.7351        | 2.5843                                               | 109.8292        | 2.7068                                               |
| 274.4885        | 2.5082                                               | 213.7439        | 2.5851                                               | 104.8799        | 2.7111                                               |
| 269.4899        | 2.5134                                               | 212.7466        | 2.5867                                               | 99.9073         | 2.7164                                               |
| 264.4887        | 2.5190                                               | 211.7334        | 2.5879                                               | 94.9684         | 2.7168                                               |
| 259.5025        | 2.5244                                               | 210.7426        | 2.5889                                               | 93.8889         | 2.7149                                               |
| 254.5157        | 2.5285                                               | 209.7421        | 2.5902                                               | 92.8120         | 2.7138                                               |
| 249.5533        | 2.5355                                               | 208.7429        | 2.5903                                               | 91.8214         | 2.7133                                               |
| 248.7221        | 2.5426                                               | 207.7495        | 2.5919                                               | 90.8130         | 2.7122                                               |
| 247.7454        | 2.5433                                               | 206.7449        | 2.5932                                               | 89.8154         | 2.7095                                               |
| 246.7489        | 2.5458                                               | 205.7518        | 2.5964                                               | 88.8246         | 2.7026                                               |
| 245.7439        | 2.5456                                               | 204.7427        | 2.5976                                               | 87.8103         | 2.6926                                               |
| 244.7323        | 2.5460                                               | 203.7490        | 2.5996                                               | 86.8273         | 2.6685                                               |
| 243.7490        | 2.5471                                               | 202.7460        | 2.6015                                               | 85.8200         | 2.6315                                               |
| 242.7291        | 2.5480                                               | 201.7614        | 2.6022                                               | 84.8268         | 2.5859                                               |
| 241.7375        | 2.5487                                               | 200.7488        | 2.6035                                               | 83.8250         | 2.5271                                               |
| 240.7368        | 2.5487                                               | 199.7419        | 2.6046                                               | 82.8443         | 2.4592                                               |
| 239.7331        | 2.5504                                               | 198.7464        | 2.6052                                               | 81.8371         | 2.3884                                               |
| 238.7410        | 2.5523                                               | 197.7565        | 2.6080                                               | 80.8451         | 2.3192                                               |
| 237.7347        | 2.5521                                               | 196.7453        | 2.6093                                               | 79.8426         | 2.2619                                               |
| 236.7855        | 2.5538                                               | 195.7562        | 2.6104                                               | 78.8541         | 2.2156                                               |
| 235.7375        | 2.5531                                               | 194.7569        | 2.6130                                               | 77.8724         | 2.1843                                               |
| 234.7395        | 2.5573                                               | 193.7507        | 2.6132                                               | 76.8619         | 2.1601                                               |
| 233.7380        | 2.5586                                               | 192.7498        | 2.6140                                               | 75.8690         | 2.1425                                               |
| 232.7354        | 2.5605                                               | 191.7543        | 2.6154                                               | 74.8671         | 2.1295                                               |
| 231.7410        | 2.5618                                               | 190.7461        | 2.6175                                               | 69.9484         | 2.0818                                               |
| 230.7422        | 2.5625                                               | 189.7446        | 2.6190                                               | 65.0284         | 2.0443                                               |
| 229.7351        | 2.5631                                               | 184.7777        | 2.6187                                               | 59.9311         | 2.0199                                               |
| 228.7426        | 2.5651                                               | 179.5733        | 2.6260                                               | 54.8381         | 2.0023                                               |
| 227.7331        | 2.5669                                               | 174.6131        | 2.6294                                               | 49.7283         | 1.9849                                               |
| 226.7433        | 2.5684                                               | 169.6093        | 2.6333                                               | 44.6299         | 1.9668                                               |
| 225.7357        | 2.5691                                               | 164.6014        | 2.6398                                               | 39.5370         | 1.9479                                               |
| 224.7401        | 2.5704                                               | 159.6257        | 2.6462                                               | 34.4509         | 1.9281                                               |
| 223.7462        | 2.5700                                               | 154.6287        | 2.6504                                               | 29.3717         | 1.9054                                               |
| 222.7467        | 2.5747                                               | 149.6279        | 2.6559                                               | 24.2850         | 1.8733                                               |
| 221.7394        | 2.5749                                               | 144.6423        | 2.6609                                               | 19.2308         | 1.8176                                               |
| 220.7430        | 2.5767                                               | 139.6324        | 2.6653                                               | 14.1559         | 1.7206                                               |
| 219.7330        | 2.5779                                               | 134.6558        | 2.6741                                               | 9.1066          | 1.5289                                               |
|                 |                                                      |                 |                                                      | 3.9993          | 1.0971                                               |

## SUPPORTING INFORMATION

**Table S3.** Magnetic data for polycrystalline sample of complex **1** in heating mode, second measurement

| Heating mode    |                                                           |                 |                                                           |                 |                                                           |
|-----------------|-----------------------------------------------------------|-----------------|-----------------------------------------------------------|-----------------|-----------------------------------------------------------|
| Temperature (K) | $\chi_{\text{M}}T$<br>( $\text{cm}^3 \text{K mol}^{-1}$ ) | Temperature (K) | $\chi_{\text{M}}T$<br>( $\text{cm}^3 \text{K mol}^{-1}$ ) | Temperature (K) | $\chi_{\text{M}}T$<br>( $\text{cm}^3 \text{K mol}^{-1}$ ) |
| 3.9939          | 1.1001                                                    | 135.2670        | 2.7143                                                    | 221.2019        | 2.5894                                                    |
| 9.0895          | 1.5478                                                    | 140.2650        | 2.7025                                                    | 222.2003        | 2.5873                                                    |
| 14.1699         | 1.7214                                                    | 145.2732        | 2.6998                                                    | 223.2133        | 2.5854                                                    |
| 19.2432         | 1.8198                                                    | 150.2813        | 2.6947                                                    | 224.1971        | 2.5843                                                    |
| 24.2871         | 1.8754                                                    | 155.3491        | 2.6898                                                    | 225.1914        | 2.5827                                                    |
| 29.3811         | 1.9088                                                    | 160.3171        | 2.6824                                                    | 226.1978        | 2.5810                                                    |
| 34.4637         | 1.9331                                                    | 165.3395        | 2.6762                                                    | 227.2019        | 2.5794                                                    |
| 39.5378         | 1.9542                                                    | 170.3489        | 2.6708                                                    | 228.1999        | 2.5765                                                    |
| 44.6236         | 1.9708                                                    | 175.3523        | 2.6643                                                    | 229.1940        | 2.5763                                                    |
| 49.7120         | 1.9905                                                    | 180.3700        | 2.6582                                                    | 230.1934        | 2.5743                                                    |
| 54.8035         | 2.0082                                                    | 185.3904        | 2.6521                                                    | 231.1940        | 2.5737                                                    |
| 59.9038         | 2.0258                                                    | 190.3855        | 2.6443                                                    | 232.1929        | 2.5715                                                    |
| 65.0012         | 2.0489                                                    | 191.2091        | 2.6309                                                    | 233.2056        | 2.5704                                                    |
| 70.0881         | 2.0773                                                    | 192.2014        | 2.6297                                                    | 234.1995        | 2.5693                                                    |
| 75.1051         | 2.1056                                                    | 193.1963        | 2.6274                                                    | 235.1940        | 2.5694                                                    |
| 76.0811         | 2.1094                                                    | 194.1947        | 2.6270                                                    | 236.1947        | 2.5700                                                    |
| 77.0840         | 2.1150                                                    | 195.1955        | 2.6238                                                    | 237.2001        | 2.5640                                                    |
| 78.0874         | 2.1203                                                    | 196.1919        | 2.6233                                                    | 238.1829        | 2.5622                                                    |
| 79.0858         | 2.1261                                                    | 197.2000        | 2.6210                                                    | 239.1918        | 2.5612                                                    |
| 80.0910         | 2.1328                                                    | 198.1977        | 2.6217                                                    | 240.1966        | 2.5585                                                    |
| 81.0850         | 2.1387                                                    | 199.1971        | 2.6196                                                    | 241.2000        | 2.5580                                                    |
| 82.0792         | 2.1475                                                    | 200.1983        | 2.6184                                                    | 242.1929        | 2.5566                                                    |
| 83.0888         | 2.1556                                                    | 201.2011        | 2.6156                                                    | 243.1990        | 2.5553                                                    |
| 84.0870         | 2.1657                                                    | 202.2043        | 2.6147                                                    | 244.1973        | 2.5534                                                    |
| 85.0841         | 2.1811                                                    | 203.1996        | 2.6154                                                    | 245.1980        | 2.5522                                                    |
| 86.0934         | 2.2021                                                    | 204.2011        | 2.6127                                                    | 246.1999        | 2.5510                                                    |
| 87.1051         | 2.2373                                                    | 205.1973        | 2.6117                                                    | 247.1933        | 2.5508                                                    |
| 88.1076         | 2.2863                                                    | 206.1932        | 2.6093                                                    | 248.2045        | 2.5491                                                    |
| 89.1136         | 2.3697                                                    | 207.2091        | 2.6075                                                    | 249.1914        | 2.5494                                                    |
| 90.1165         | 2.4943                                                    | 208.1948        | 2.6075                                                    | 250.1992        | 2.5489                                                    |
| 91.0909         | 2.6220                                                    | 209.1905        | 2.6066                                                    | 250.0069        | 2.5444                                                    |
| 92.1092         | 2.6921                                                    | 210.2031        | 2.6043                                                    | 255.4198        | 2.5467                                                    |
| 93.1095         | 2.7170                                                    | 211.2062        | 2.6029                                                    | 260.4338        | 2.5402                                                    |
| 94.1031         | 2.7253                                                    | 212.2073        | 2.6026                                                    | 265.4481        | 2.5329                                                    |
| 95.1048         | 2.7303                                                    | 213.2060        | 2.6009                                                    | 270.4337        | 2.5262                                                    |
| 100.1849        | 2.7426                                                    | 214.1964        | 2.5999                                                    | 275.4362        | 2.5198                                                    |
| 105.1894        | 2.7437                                                    | 215.1991        | 2.5991                                                    | 280.4412        | 2.5106                                                    |
| 110.1854        | 2.7402                                                    | 216.1966        | 2.5964                                                    | 285.4367        | 2.5014                                                    |
| 115.2340        | 2.7386                                                    | 217.1922        | 2.5951                                                    | 290.4439        | 2.4951                                                    |
| 120.2296        | 2.7333                                                    | 218.2001        | 2.5926                                                    | 295.4395        | 2.4903                                                    |
| 125.2524        | 2.7292                                                    | 219.1974        | 2.5918                                                    | 300.4723        | 2.4852                                                    |
| 130.2137        | 2.7196                                                    | 220.1997        | 2.5913                                                    |                 |                                                           |

## SUPPORTING INFORMATION

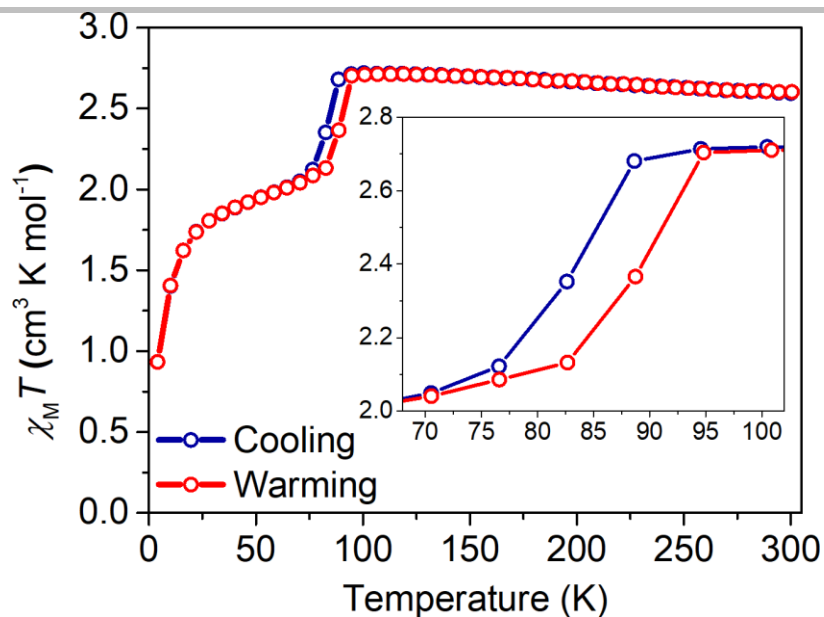

**Figure S1:** Plot of  $\chi_M T$  versus temperature,  $T$  for complex 1 in cooling (blue curve) and heating (red curve) modes between 300 K and 4 K measured at 5 K intervals with the inset showing the 8 K wide hysteretic transition.

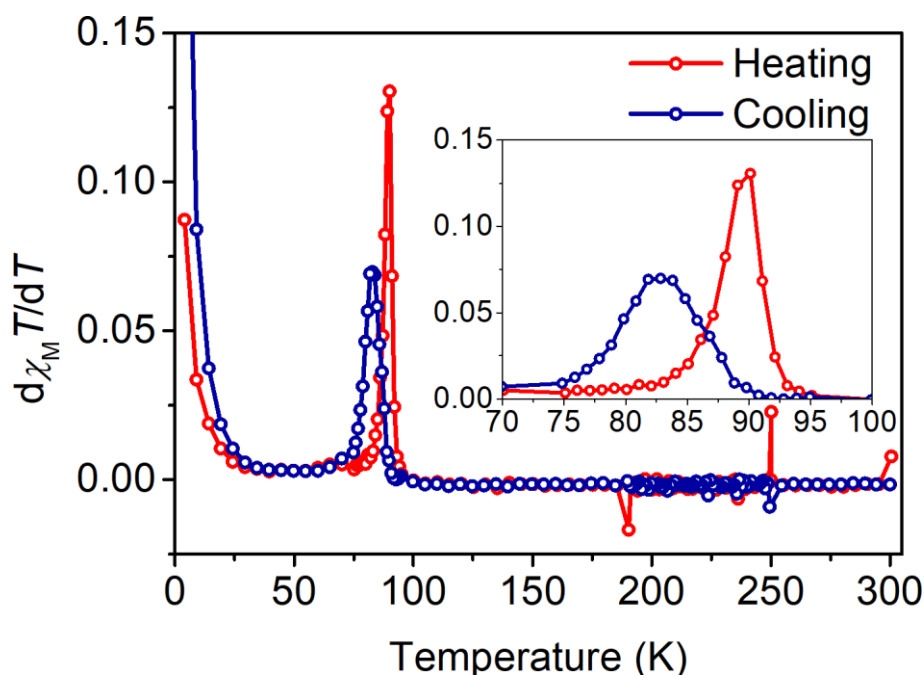

**Figure S2:** Derivative of  $\chi_M T$  versus temperature,  $T$  for complex 1 showing discontinuities with  $d\chi_M T/dT$  maximum values at 82 K (cooling) and 90 K (heating) respectively.

## SUPPORTING INFORMATION

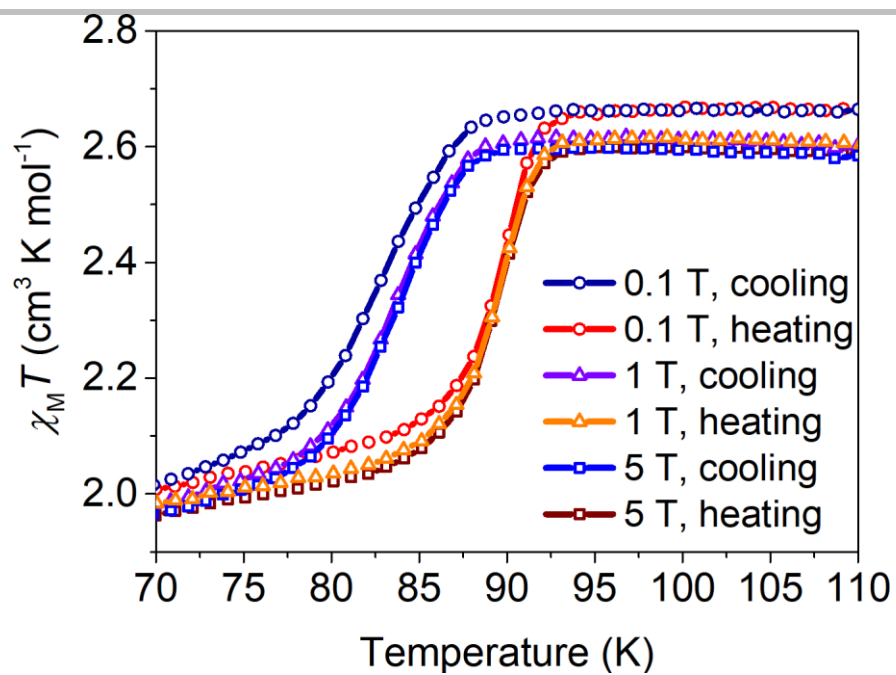

**Figure S3:** Influence of magnetic field on hysteresis window between 70 K and 110 K measured at 0.1 T, 1 T and 5 T.

## SUPPORTING INFORMATION

## 3. Single crystal X-ray diffraction

## 3.1 Crystal and structure refinement data

**Table S4.** Crystallographic data for complex **1** at 25 K, 83 K, 110 K, 150 K, 250 K and 293 K

|                                               | 1, 25 K                                                                                                                                             | 1, 83 K                                                                                                                                             | 1, 110 K                                                                                                                                            | 1, 150 K                                                                                                                                            | 1, 250 K                                                                                                                                            | 1, 293 K                                                                                                                                            |
|-----------------------------------------------|-----------------------------------------------------------------------------------------------------------------------------------------------------|-----------------------------------------------------------------------------------------------------------------------------------------------------|-----------------------------------------------------------------------------------------------------------------------------------------------------|-----------------------------------------------------------------------------------------------------------------------------------------------------|-----------------------------------------------------------------------------------------------------------------------------------------------------|-----------------------------------------------------------------------------------------------------------------------------------------------------|
| Identification code                           | MndiBr025K                                                                                                                                          | MndiBr083K                                                                                                                                          | MndiBr110K                                                                                                                                          | MndiBr150K                                                                                                                                          | MndiBr250K                                                                                                                                          | MndiBr293K                                                                                                                                          |
| Empirical formula                             | C <sub>46</sub> H <sub>44</sub> BBr <sub>4</sub> MnN <sub>4</sub> O <sub>2</sub>                                                                    | C <sub>46</sub> H <sub>44</sub> BBr <sub>4</sub> MnN <sub>4</sub> O <sub>2</sub>                                                                    | C <sub>46</sub> H <sub>44</sub> BBr <sub>4</sub> MnN <sub>4</sub> O <sub>2</sub>                                                                    | C <sub>46</sub> H <sub>44</sub> BBr <sub>4</sub> MnN <sub>4</sub> O <sub>2</sub>                                                                    | C <sub>46</sub> H <sub>44</sub> BBr <sub>4</sub> MnN <sub>4</sub> O <sub>2</sub>                                                                    | C <sub>46</sub> H <sub>44</sub> BBr <sub>4</sub> MnN <sub>4</sub> O <sub>2</sub>                                                                    |
| Molecular formula                             | [C <sub>22</sub> H <sub>24</sub> N <sub>4</sub> O <sub>2</sub> MnBr <sub>4</sub> ] <sup>+</sup><br>[C <sub>24</sub> H <sub>20</sub> B] <sup>-</sup> | [C <sub>22</sub> H <sub>24</sub> N <sub>4</sub> O <sub>2</sub> MnBr <sub>4</sub> ] <sup>+</sup><br>[C <sub>24</sub> H <sub>20</sub> B] <sup>-</sup> | [C <sub>22</sub> H <sub>24</sub> N <sub>4</sub> O <sub>2</sub> MnBr <sub>4</sub> ] <sup>+</sup><br>[C <sub>24</sub> H <sub>20</sub> B] <sup>-</sup> | [C <sub>22</sub> H <sub>24</sub> N <sub>4</sub> O <sub>2</sub> MnBr <sub>4</sub> ] <sup>+</sup><br>[C <sub>24</sub> H <sub>20</sub> B] <sup>-</sup> | [C <sub>22</sub> H <sub>24</sub> N <sub>4</sub> O <sub>2</sub> MnBr <sub>4</sub> ] <sup>+</sup><br>[C <sub>24</sub> H <sub>20</sub> B] <sup>-</sup> | [C <sub>22</sub> H <sub>24</sub> N <sub>4</sub> O <sub>2</sub> MnBr <sub>4</sub> ] <sup>+</sup><br>[C <sub>24</sub> H <sub>20</sub> B] <sup>-</sup> |
| Formula weight                                | 1070.24                                                                                                                                             | 1070.24                                                                                                                                             | 1070.24                                                                                                                                             | 1070.24                                                                                                                                             | 1070.24                                                                                                                                             | 1070.24                                                                                                                                             |
| Wavelength (Å)                                | 1.54184                                                                                                                                             | 1.54184                                                                                                                                             | 1.54184                                                                                                                                             | 1.54184                                                                                                                                             | 1.54184                                                                                                                                             | 0.71073                                                                                                                                             |
| Crystal system                                | Triclinic                                                                                                                                           | Triclinic                                                                                                                                           | Monoclinic                                                                                                                                          | Monoclinic                                                                                                                                          | Monoclinic                                                                                                                                          | Monoclinic                                                                                                                                          |
| Space group                                   | P1                                                                                                                                                  | P1                                                                                                                                                  | Pc                                                                                                                                                  | Pc                                                                                                                                                  | Cc                                                                                                                                                  | Cc                                                                                                                                                  |
| a (Å)                                         | 14.1317(6)                                                                                                                                          | 14.1644(3)                                                                                                                                          | 14.86749(12)                                                                                                                                        | 14.87250(10)                                                                                                                                        | 14.9312(3)                                                                                                                                          | 14.9671(4)                                                                                                                                          |
| b (Å)                                         | 23.2539(7)                                                                                                                                          | 23.2476(4)                                                                                                                                          | 22.71089(12)                                                                                                                                        | 22.75550(10)                                                                                                                                        | 22.8858(4)                                                                                                                                          | 22.9481(5)                                                                                                                                          |
| c (Å)                                         | 13.4869(4)                                                                                                                                          | 13.5125(2)                                                                                                                                          | 14.14859(13)                                                                                                                                        | 14.1802(2)                                                                                                                                          | 14.2892(4)                                                                                                                                          | 14.3590(4)                                                                                                                                          |
| α (°)                                         | 86.387(2)                                                                                                                                           | 86.3840(10)                                                                                                                                         | 90                                                                                                                                                  | 90                                                                                                                                                  | 90                                                                                                                                                  | 90                                                                                                                                                  |
| β (°)                                         | 103.852(3)                                                                                                                                          | 103.918(2)                                                                                                                                          | 116.4274(11)                                                                                                                                        | 116.4640(10)                                                                                                                                        | 116.636(3)                                                                                                                                          | 116.674(4)                                                                                                                                          |
| γ (°)                                         | 99.921(3)                                                                                                                                           | 100.058(2)                                                                                                                                          | 90                                                                                                                                                  | 90                                                                                                                                                  | 90                                                                                                                                                  | 90                                                                                                                                                  |
| Volume (Å <sup>3</sup> )                      | 4237.7(3)                                                                                                                                           | 4251.47(14)                                                                                                                                         | 4278.09(7)                                                                                                                                          | 4296.15(8)                                                                                                                                          | 4364.6(2)                                                                                                                                           | 4407.0(2)                                                                                                                                           |
| Z                                             | 4                                                                                                                                                   | 4                                                                                                                                                   | 4                                                                                                                                                   | 4                                                                                                                                                   | 4                                                                                                                                                   | 4                                                                                                                                                   |
| Density (calculated)<br>(mg/m <sup>3</sup> )  | 1.677                                                                                                                                               | 1.672                                                                                                                                               | 1.662                                                                                                                                               | 1.655                                                                                                                                               | 1.629                                                                                                                                               | 1.613                                                                                                                                               |
| Absorption coefficient<br>(mm <sup>-1</sup> ) | 7.297                                                                                                                                               | 7.273                                                                                                                                               | 7.228                                                                                                                                               | 7.198                                                                                                                                               | 7.085                                                                                                                                               | 3.969                                                                                                                                               |
| Crystal size (mm <sup>3</sup> )               | 0.121 × 0.117 × 0.058                                                                                                                               | 0.152 × 0.113 × 0.062                                                                                                                               | 0.136 × 0.121 × 0.093                                                                                                                               | 0.136 × 0.121 × 0.093                                                                                                                               | 0.136 × 0.121 × 0.093                                                                                                                               | 0.467 × 0.395 × 0.205                                                                                                                               |
| Goodness-of-fit on F <sup>2</sup>             | 1.013                                                                                                                                               | 1.01                                                                                                                                                | 1.02                                                                                                                                                | 1.024                                                                                                                                               | 1.038                                                                                                                                               | 1.054                                                                                                                                               |
| Final R indices<br>[I>2σ(I)]                  | R <sub>1</sub> = 0.0932, wR <sub>2</sub> =<br>0.2440                                                                                                | R <sub>1</sub> = 0.0448, wR <sub>2</sub> =<br>0.1149                                                                                                | R <sub>1</sub> = 0.0228, wR <sub>2</sub> =<br>0.0512                                                                                                | R <sub>1</sub> = 0.0268, wR <sub>2</sub> =<br>0.0619                                                                                                | R <sub>1</sub> = 0.0320, wR <sub>2</sub> =<br>0.0794                                                                                                | R <sub>1</sub> = 0.0360, wR <sub>2</sub> =<br>0.0920                                                                                                |
| Absolute structure<br>parameter               | -0.025(7)                                                                                                                                           | 0.001(4)                                                                                                                                            | 0.005(2)                                                                                                                                            | 0.009(2)                                                                                                                                            | 0.000(3)                                                                                                                                            | 0.013(9)                                                                                                                                            |

## SUPPORTING INFORMATION

**Table S5.** Selected bond lengths (Å) and angles (°) for complex 1

|                          | 1 (25 K)  | 1 (83 K)  | 1 (110 K)  | 1 (150 K)  | 1 (250 K)  | 1 (293 K)  |
|--------------------------|-----------|-----------|------------|------------|------------|------------|
| Mn1-O1 <sub>phen</sub>   | 1.868(14) | 1.875(7)  | 1.868(2)   | 1.866(3)   | 1.864(3)   | 1.866(3)   |
| Mn1-O2 <sub>phen</sub>   | 1.908(15) | 1.892(7)  | 1.879(2)   | 1.879(3)   | 1.879(3)   | 1.876(4)   |
| Mn1-N1 <sub>imine</sub>  | 2.008(18) | 2.002(8)  | 2.101(3)   | 2.098(3)   | 2.102(4)   | 2.104(4)   |
| Mn1-N2 <sub>amine</sub>  | 2.08(2)   | 2.082(9)  | 2.262(3)   | 2.259(4)   | 2.232(5)   | 2.230(5)   |
| Mn1-N3 <sub>amine</sub>  | 2.058(16) | 2.059(8)  | 2.209(3)   | 2.206(4)   | 2.218(5)   | 2.221(5)   |
| Mn1-N4 <sub>imine</sub>  | 1.99(2)   | 2.002(10) | 2.094(3)   | 2.090(4)   | 2.075(5)   | 2.079(5)   |
| Mn2-O3 <sub>phen</sub>   | 1.903(14) | 1.880(7)  | 1.874(2)   | 1.874(3)   | -          | -          |
| Mn2-O4 <sub>phen</sub>   | 1.880(15) | 1.890(7)  | 1.880(2)   | 1.879(3)   | -          | -          |
| Mn2-N5 <sub>imine</sub>  | 2.10(2)   | 2.126(9)  | 2.126(3)   | 2.119(4)   | -          | -          |
| Mn2-N6 <sub>amine</sub>  | 2.24(2)   | 2.244(10) | 2.224(3)   | 2.216(4)   | -          | -          |
| Mn2-N7 <sub>amine</sub>  | 2.26(2)   | 2.261(9)  | 2.257(3)   | 2.252(4)   | -          | -          |
| Mn2-N8 <sub>imine</sub>  | 2.064(19) | 2.081(10) | 2.078(3)   | 2.076(4)   | -          | -          |
| Mn3-O5 <sub>phen</sub>   | 1.862(15) | 1.869(7)  | -          | -          | -          | -          |
| Mn3-O6 <sub>phen</sub>   | 1.886(16) | 1.890(7)  | -          | -          | -          | -          |
| Mn3-N9 <sub>imine</sub>  | 2.117(18) | 2.113(8)  | -          | -          | -          | -          |
| Mn3-N10 <sub>amine</sub> | 2.21(2)   | 2.252(10) | -          | -          | -          | -          |
| Mn3-N11 <sub>amine</sub> | 2.208(17) | 2.223(9)  | -          | -          | -          | -          |
| Mn3-N12 <sub>imine</sub> | 2.09(2)   | 2.091(10) | -          | -          | -          | -          |
| Mn4-O7 <sub>phen</sub>   | 1.904(15) | 1.888(7)  | -          | -          | -          | -          |
| Mn4-O8 <sub>phen</sub>   | 1.883(15) | 1.884(7)  | -          | -          | -          | -          |
| Mn4-N13 <sub>imine</sub> | 2.025(18) | 2.034(8)  | -          | -          | -          | -          |
| Mn4-N14 <sub>amine</sub> | 2.07(2)   | 2.127(10) | -          | -          | -          | -          |
| Mn4-N15 <sub>amine</sub> | 2.080(19) | 2.117(9)  | -          | -          | -          | -          |
| Mn4-N16 <sub>imine</sub> | 1.98(2)   | 2.018(10) | -          | -          | -          | -          |
| O1-Mn1-O2                | 176.2(7)  | 176.3(3)  | 175.44(12) | 175.71(13) | 176.59(17) | 176.52(18) |
| O1-Mn1-N1                | 89.9(8)   | 89.9(3)   | 88.74(11)  | 88.62(13)  | 87.99(15)  | 88.01(16)  |
| O1-Mn1-N2                | 92.3(8)   | 92.2(3)   | 94.98(12)  | 94.81(13)  | 94.09(17)  | 93.96(19)  |
| O1-Mn1-N3                | 85.5(7)   | 85.6(3)   | 85.73(11)  | 85.74(13)  | 85.84(17)  | 85.96(18)  |
| O1-Mn1-N4                | 89.8(8)   | 89.9(3)   | 89.42(12)  | 89.50(13)  | 89.95(16)  | 90.31(17)  |
| O2-Mn1-N1                | 93.8(8)   | 93.8(3)   | 92.91(11)  | 93.00(13)  | 92.91(16)  | 92.78(17)  |
| O2-Mn1-N2                | 88.8(7)   | 88.8(3)   | 89.47(12)  | 89.36(13)  | 89.29(17)  | 89.51(18)  |
| O2-Mn1-N3                | 91.0(7)   | 90.9(3)   | 94.14(11)  | 94.05(13)  | 94.40(17)  | 94.41(18)  |
| O2-Mn1-N4                | 88.7(7)   | 88.7(3)   | 86.02(11)  | 86.21(13)  | 86.68(16)  | 86.26(16)  |
| N1-Mn1-N2                | 85.7(8)   | 86.2(4)   | 81.66(12)  | 81.77(14)  | 81.8(2)    | 81.8(2)    |
| N1-Mn1-N3                | 169.3(8)  | 169.6(4)  | 159.49(13) | 159.57(14) | 159.6(2)   | 159.8(2)   |
| N2-Mn1-N3                | 84.8(7)   | 84.6(4)   | 79.16(12)  | 79.16(14)  | 79.3(2)    | 79.4(2)    |
| N4-Mn1-N1                | 100.4(8)  | 100.0(4)  | 112.77(12) | 112.75(14) | 112.83(18) | 112.67(19) |
| N4-Mn1-N2                | 173.5(7)  | 173.5(3)  | 165.05(11) | 165.00(13) | 165.0(2)   | 165.0(2)   |

## SUPPORTING INFORMATION

|             |          |          |            |            |         |         |
|-------------|----------|----------|------------|------------|---------|---------|
| N4-Mn1-N3   | 89.3(7)  | 89.4(4)  | 86.94(12)  | 86.85(14)  | 86.6(2) | 86.6(2) |
| O3-Mn2-O4   | 176.4(7) | 176.2(3) | 176.77(12) | 176.78(14) | -       | -       |
| O3-Mn2-N5   | 88.1(7)  | 87.6(3)  | 87.67(11)  | 87.73(13)  | -       | -       |
| O3-Mn2-N6   | 95.1(7)  | 95.3(3)  | 94.42(12)  | 94.27(13)  | -       | -       |
| O3-Mn2-N7   | 84.4(7)  | 85.1(3)  | 85.18(11)  | 85.21(13)  | -       | -       |
| O3-Mn2-N8   | 90.4(7)  | 90.0(3)  | 89.90(12)  | 89.95(13)  | -       | -       |
| O4-Mn2-N5   | 92.0(7)  | 92.4(3)  | 92.47(11)  | 92.50(13)  | -       | -       |
| O4-Mn2-N6   | 88.5(7)  | 88.5(3)  | 88.79(12)  | 88.93(13)  | -       | -       |
| O4-Mn2-N7   | 96.7(7)  | 96.2(3)  | 95.82(11)  | 95.69(13)  | -       | -       |
| O4-Mn2-N8   | 86.3(7)  | 86.5(3)  | 87.11(12)  | 87.04(13)  | -       | -       |
| N5-Mn2-N6   | 82.8(8)  | 81.4(4)  | 81.52(13)  | 81.53(15)  | -       | -       |
| N5-Mn2-N7   | 158.6(8) | 157.6(4) | 158.11(13) | 158.26(15) | -       | -       |
| N7-Mn2-N6   | 77.9(8)  | 78.2(4)  | 78.44(14)  | 78.54(16)  | -       | -       |
| N8-Mn2-N5   | 115.2(7) | 116.1(3) | 114.97(13) | 114.75(14) | -       | -       |
| N8-Mn2-N6   | 161.4(7) | 161.9(4) | 163.15(13) | 163.37(15) | -       | -       |
| N8-Mn2-N7   | 84.9(7)  | 85.1(4)  | 85.72(13)  | 85.82(15)  | -       | -       |
| O5-Mn3-O6   | 175.4(8) | 175.3(4) | -          | -          | -       | -       |
| O5-Mn3-N9   | 88.0(7)  | 88.3(3)  | -          | -          | -       | -       |
| O5-Mn3-N10  | 95.5(7)  | 94.8(3)  | -          | -          | -       | -       |
| O5-Mn3-N11  | 85.7(6)  | 85.7(3)  | -          | -          | -       | -       |
| O5-Mn3-N12  | 88.8(7)  | 89.6(3)  | -          | -          | -       | -       |
| O6-Mn3-N9   | 93.2(7)  | 92.6(3)  | -          | -          | -       | -       |
| O6-Mn3-N10  | 89.1(7)  | 89.9(3)  | -          | -          | -       | -       |
| O6-Mn3-N11  | 94.7(6)  | 95.0(3)  | -          | -          | -       | -       |
| O6-Mn3-N12  | 86.7(7)  | 85.8(3)  | -          | -          | -       | -       |
| N9-Mn3-N10  | 82.2(7)  | 82.0(3)  | -          | -          | -       | -       |
| N9-Mn3-N11  | 159.0(7) | 159.1(4) | -          | -          | -       | -       |
| N11-Mn3-N10 | 78.5(7)  | 78.5(3)  | -          | -          | -       | -       |
| N12-Mn3-N9  | 112.3(8) | 112.7(3) | -          | -          | -       | -       |
| N12-Mn3-N10 | 165.0(7) | 164.8(3) | -          | -          | -       | -       |
| N12-Mn3-N11 | 87.5(7)  | 87.3(3)  | -          | -          | -       | -       |
| O7-Mn4-O8   | 176.2(6) | 176.2(3) | -          | -          | -       | -       |
| O7-Mn4-N13  | 90.1(7)  | 89.3(3)  | -          | -          | -       | -       |
| O7-Mn4-N14  | 94.7(7)  | 94.5(3)  | -          | -          | -       | -       |
| O7-Mn4-N15  | 85.6(7)  | 85.2(3)  | -          | -          | -       | -       |
| O7-Mn4-N16  | 88.8(7)  | 89.6(4)  | -          | -          | -       | -       |
| O8-Mn4-N13  | 93.5(7)  | 94.1(3)  | -          | -          | -       | -       |
| O8-Mn4-N14  | 86.8(7)  | 87.6(3)  | -          | -          | -       | -       |
| O8-Mn4-N15  | 91.1(7)  | 92.0(3)  | -          | -          | -       | -       |
| O8-Mn4-N16  | 89.3(7)  | 87.8(3)  | -          | -          | -       | -       |



## SUPPORTING INFORMATION

---

|             |          |          |   |   |   |   |
|-------------|----------|----------|---|---|---|---|
| N13-Mn4-N14 | 84.9(8)  | 83.5(4)  | - | - | - | - |
| N13-Mn4-N15 | 167.6(8) | 164.6(4) | - | - | - | - |
| N15-Mn4-N14 | 83.9(8)  | 82.6(4)  | - | - | - | - |
| N16-Mn4-N13 | 102.2(8) | 106.0(4) | - | - | - | - |
| N16-Mn4-N14 | 172.1(7) | 169.7(4) | - | - | - | - |
| N16-Mn4-N15 | 89.3(8)  | 88.4(4)  | - | - | - | - |

---

## SUPPORTING INFORMATION

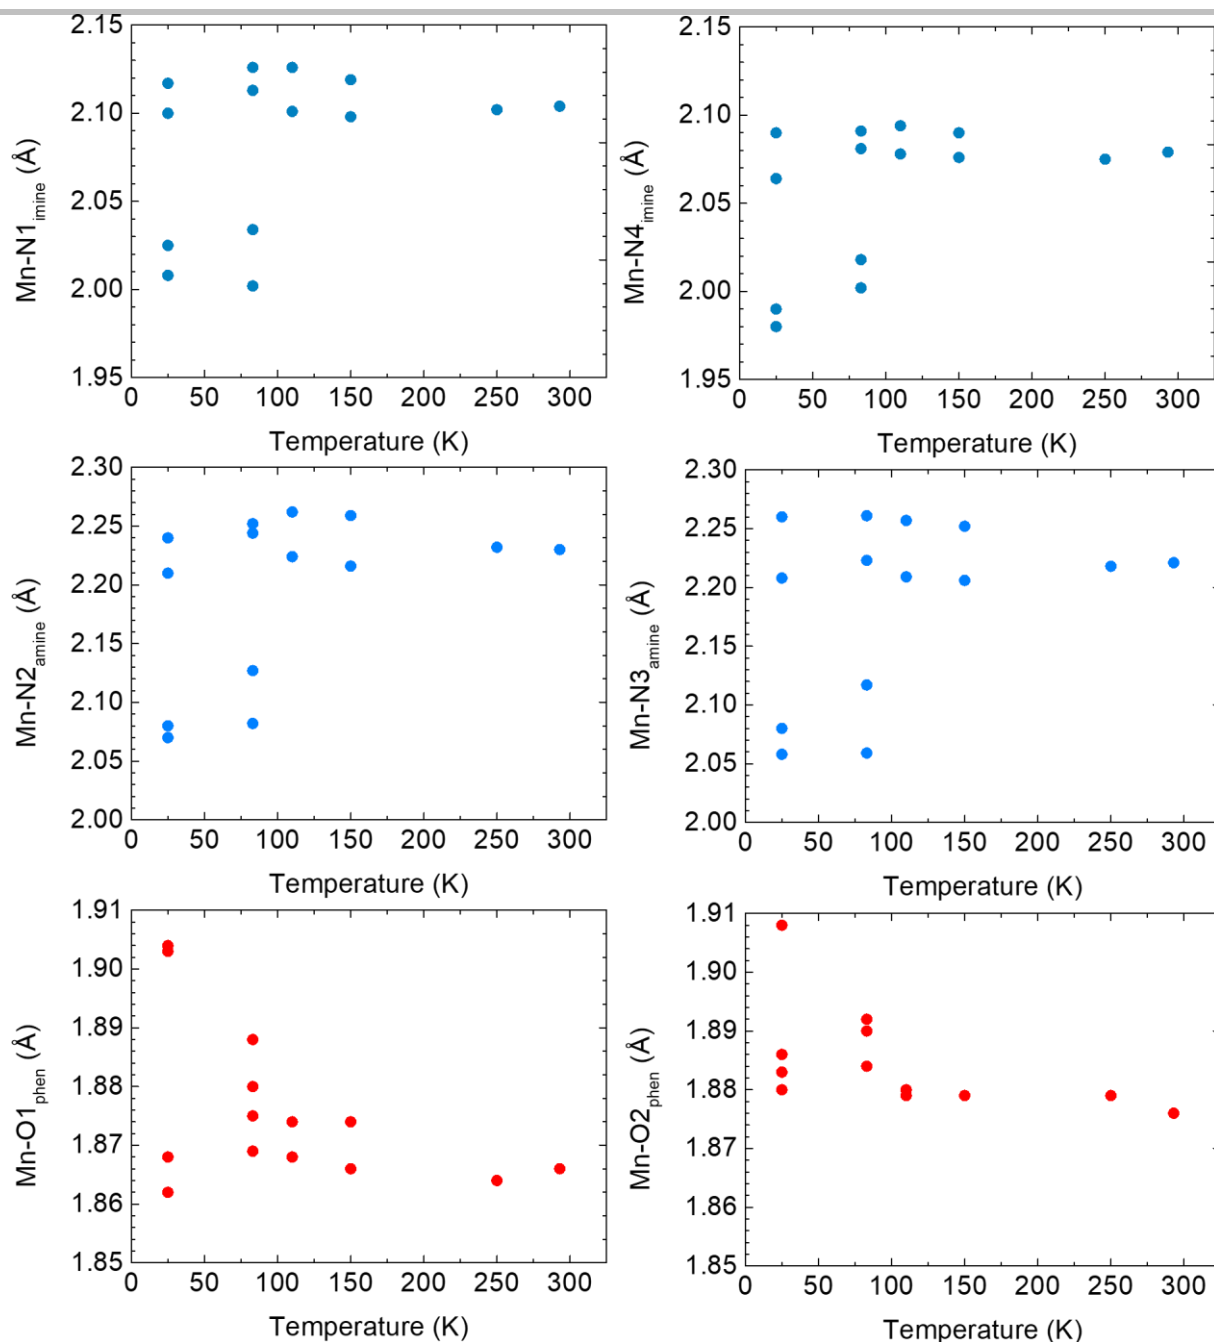

**Figure S4:** Evolution of bond lengths between the nitrogen and oxygen donor atoms in the first coordination sphere to the  $\text{Mn}^{3+}$  cation(s) of complex **1** measured at 293 K, 250 K, 150 K, 110 K, 83 K and 25 K.

A small increase in bond lengths of  $\text{Mn-N}_{\text{amine}}$ ,  $\text{Mn-N}_{\text{imine}}$  and  $\text{Mn-O}_{\text{phen}}$  is observed going from the HT structures at 293 K and 250 K to the INT structures at 150 K and 110 K. Upon cooling further down, the LT structures at 83 K and 25 K sees an overall increase in  $\text{Mn-O}_{\text{phen}}$  bond lengths compared to the INT structures at 110 K and 150 K. For  $\text{Mn-N1}_{\text{imine}}$ ,  $\text{Mn-N2}_{\text{amine}}$ , and  $\text{Mn-N3}_{\text{amine}}$ , the bond lengths remain more or less the same at 83 K and 25 K for both  $S = 2$   $\text{Mn}^{3+}$  cations as compared to the bond lengths observed at 110 K. A decrease in bond lengths is observed for the  $S = 1$   $\text{Mn}^{3+}$  cations due to the depopulation of the  $d_{x^2-y^2}$  orbital of the anti-bonding  $e_g^*$  orbitals in the  $S = 1$  state.

## SUPPORTING INFORMATION

**Table S6.** Calculated distortion parameters and list of spin states for each asymmetric  $[\text{MnL}]^+$  cation in complex 1 at 25 K, 83 K, 110 K, 150 K, 250 K and 293 K.  $Z'$  is the number of  $\text{Mn}^{3+}$  sites in the asymmetric unit.

| Temperature                        |         | 25 K      | 83 K      | 110 K         | 150 K         | 250 K     | 293 K     |
|------------------------------------|---------|-----------|-----------|---------------|---------------|-----------|-----------|
| Space group                        |         | <i>P1</i> | <i>P1</i> | <i>Pc</i>     | <i>Pc</i>     | <i>Cc</i> | <i>Cc</i> |
| $Z'$ <sup>a</sup>                  |         | 4         | 4         | 2             | 2             | 1         | 1         |
| Parameter                          | Mn site |           |           |               |               |           |           |
| $\Sigma\text{Mn}$ (°) <sup>b</sup> | Mn1     | 34.88     | 33.72     | 67.67         | 67.41         | 66.89     | 66.50     |
|                                    | Mn2     | 76.42     | 77.57     | 73.38         | 72.47         | -         | -         |
|                                    | Mn3     | 69.29     | 67.99     | -             | -             | -         | -         |
|                                    | Mn4     | 43.13     | 52.63     | -             | -             | -         | -         |
| $\Phi$ (°) <sup>c</sup>            | Mn1     | 117.72    | 113.68    | 259.89 278.87 | 257.63 275.10 | 253.49    | 251.50    |
|                                    | Mn2     | 287.88    | 295.61    | -             | -             | -         | -         |
|                                    | Mn3     | 263.73    | 264.03    | -             | -             | -         | -         |
|                                    | Mn4     | 143.12    | 180.41    | -             | -             | -         | -         |
| $\zeta$ (Å) <sup>d</sup>           | Mn1     | 0.388     | 0.409     | 0.780 0.785   | 0.775 0.772   | 0.759     | 0.769     |
|                                    | Mn2     | 0.751     | 0.783     | -             | -             | -         | -         |
|                                    | Mn3     | 0.749     | 0.777     | -             | -             | -         | -         |
|                                    | Mn4     | 0.406     | 0.501     | -             | -             | -         | -         |
| Spin state                         | Mn1     | S = 1     | S = 1     | S = 2         | S = 2         | S = 2     | S = 2     |
|                                    | Mn2     | S = 2     | S = 2     | S = 2         | S = 2         | -         | -         |
|                                    | Mn3     | S = 2     | S = 2     | -             | -             | -         | -         |
|                                    | Mn4     | S = 1     | S = 1     | -             | -             | -         | -         |

<sup>a</sup>  $Z'$  is number of independent sites in the asymmetric unit. <sup>b</sup>  $\Sigma\text{Mn}$  is the sum of the deviation from  $90^\circ$  of the 12 cis-angles of the  $\text{MnN}_4\text{O}_2$  octahedron. <sup>c</sup>  $\Phi$  is the sum of the deviation from  $60^\circ$  of the 24 trigonal angles of the projection of the  $\text{MnN}_4\text{O}_2$  octahedron onto the trigonal faces. <sup>d</sup>  $\zeta$  is the distance distortion parameter, which is the sum of deviation from individual M-X bond distances with respect to the mean metal-ligand bond distance.<sup>[7]</sup>

## SUPPORTING INFORMATION

## 3.2 Crystal structures and packing of complex 1

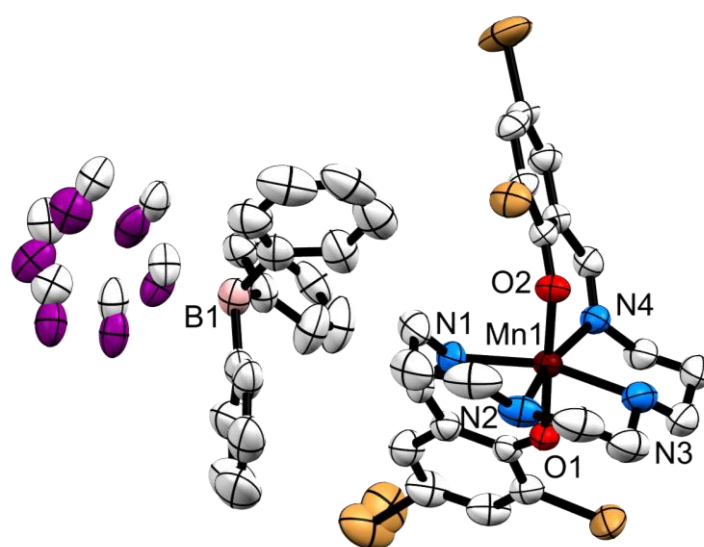

**Figure S5:** Asymmetric unit of complex 1,  $[\text{Mn}(\text{3,5-diBr-sal})_2\text{323}]\text{BPh}_4$  measured at 293 K shown with 50% probability ellipsoids with hydrogen atoms omitted for clarity. The disordered carbon atoms on the  $\text{BPh}_4^-$  anion are highlighted in purple.

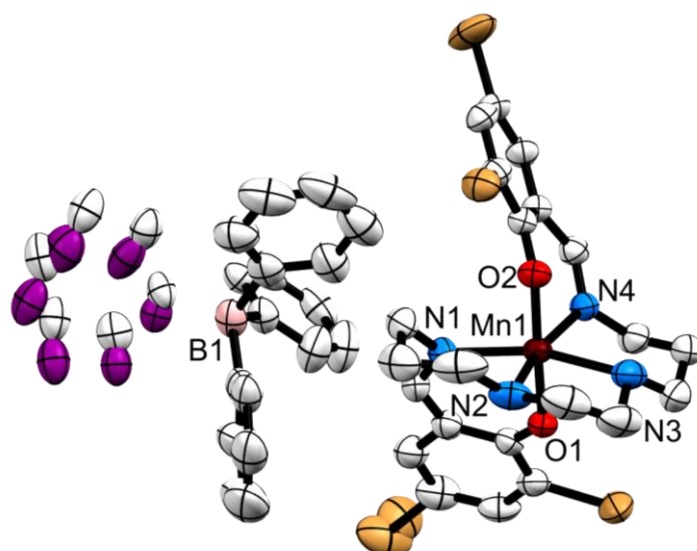

**Figure S6:** Asymmetric unit of complex 1,  $[\text{Mn}(\text{3,5-diBr-sal})_2\text{323}]\text{BPh}_4$  measured at 250 K shown with 50% probability ellipsoids with hydrogen atoms omitted for clarity. The disordered carbon atoms on the  $\text{BPh}_4^-$  anion are highlighted in purple.

## SUPPORTING INFORMATION

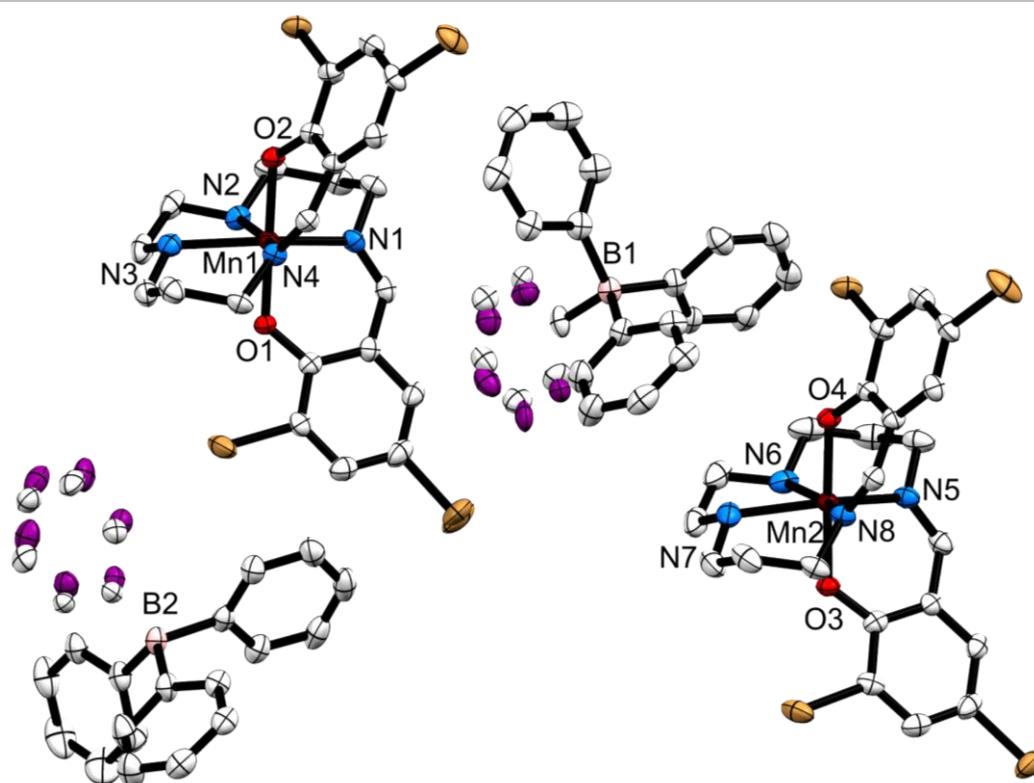

**Figure S7:** Asymmetric unit of complex 1,  $[\text{Mn}(\text{3,5-diBr-sal})_2\text{323}]\text{BPh}_4$  measured at 150 K shown with 50% probability ellipsoids with hydrogen atoms omitted for clarity. The disordered carbon atoms on the  $\text{BPh}_4^-$  anion are highlighted in purple.

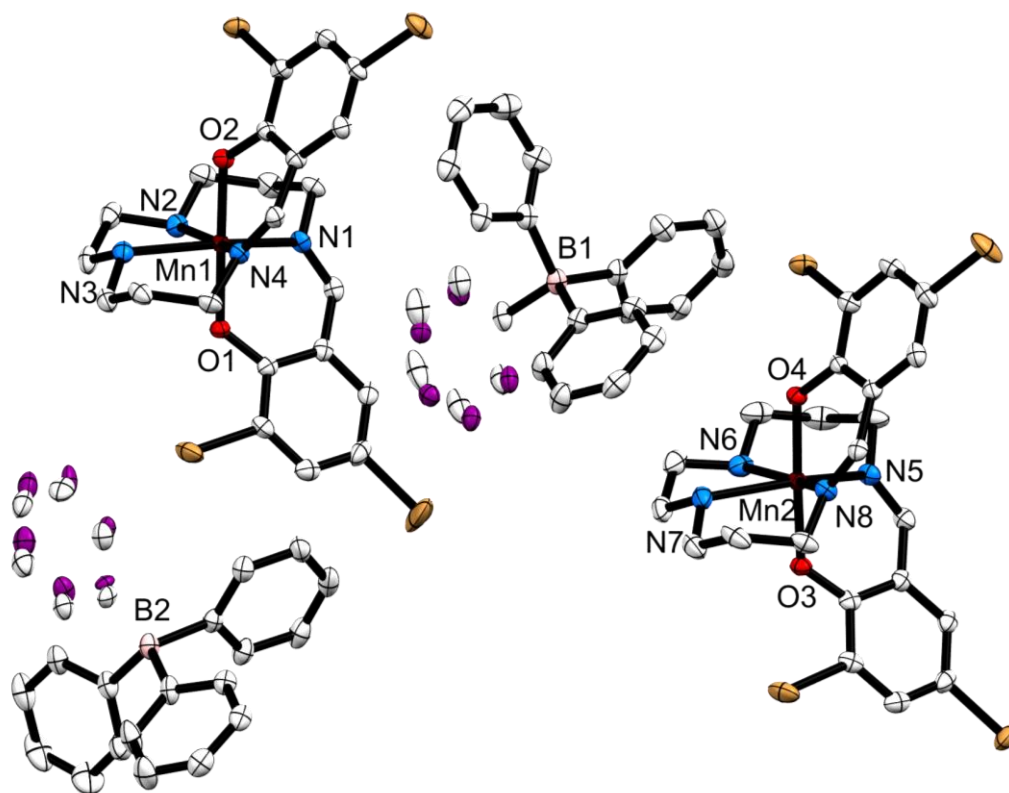

**Figure S8:** Asymmetric unit of complex 1,  $[\text{Mn}(\text{3,5-diBr-sal})_2\text{323}]\text{BPh}_4$  measured at 110 K shown with 50% probability ellipsoids with hydrogen atoms omitted for clarity. The disordered carbon atoms on the  $\text{BPh}_4^-$  anion are highlighted in purple.

## SUPPORTING INFORMATION

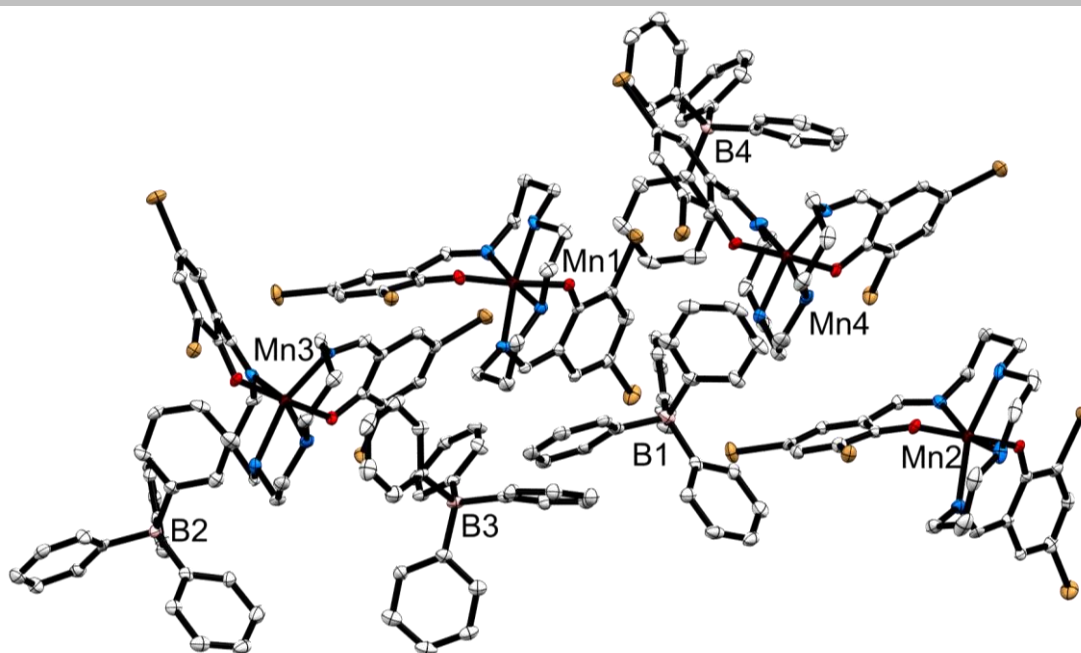

**Figure S9:** Asymmetric unit of complex **1**,  $[\text{Mn}(\text{3,5-diBr-sal})_2\text{323}]\text{BPh}_4$  measured at 83 K shown with 50% probability ellipsoids with hydrogen atoms omitted for clarity.

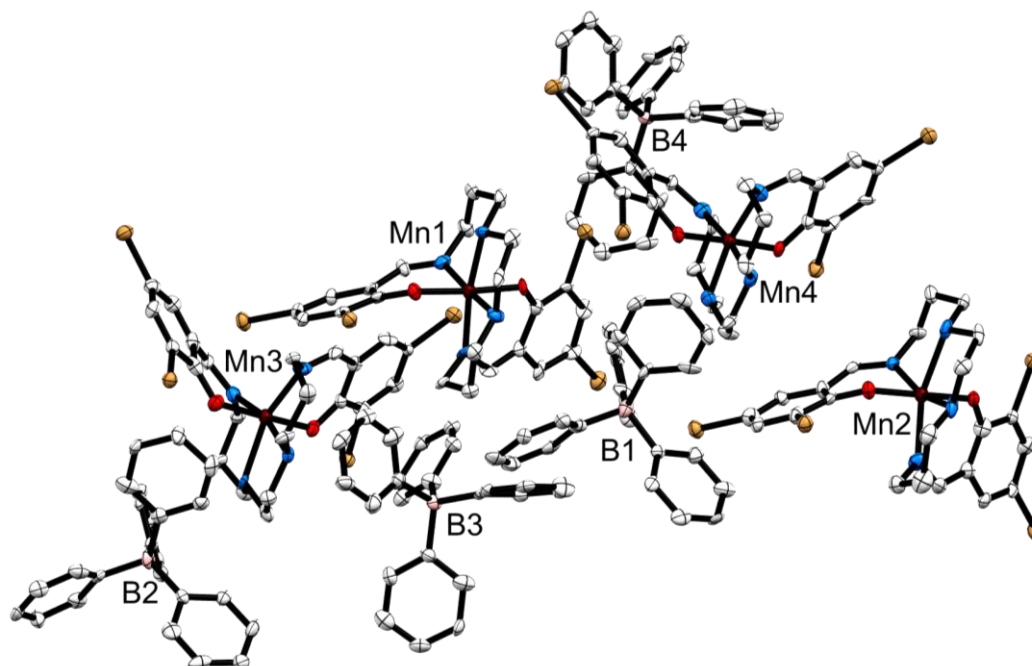

**Figure S10:** Asymmetric unit of complex **1**,  $[\text{Mn}(\text{3,5-diBr-sal})_2\text{323}]\text{BPh}_4$  measured at 25 K shown with 50% probability ellipsoids with hydrogen atoms omitted for clarity.

Complex **1** crystallises in the non-centrosymmetric polar space group  $Cc$  at 293 K, 250 K and 100 K\* respectively. At 150 K and 110 K, complex **1** crystallises in the non-centrosymmetric polar space group  $Pc$  and at 83 K in the non-symmetric chiral and polar space group  $P1$ . Complex **1** contains the  $[\text{Mn}(\text{3,5-diBr-sal}_2\text{(323))}]^+$  cation and the tetraphenylborate counteranion,  $\text{BPh}_4^-$ . Each structure contains four  $\text{Mn}^{3+}$  cations and four  $\text{BPh}_4^-$  anions in the unit cell. Hence, the  $Cc$  structures have  $Z = 4$  but  $Z' = 1$ , the  $Pc$  structures have  $Z = 4$  but  $Z' = 2$  and the  $P1$  structure has  $Z = 4$  and  $Z' = 4$ . The structures are all polar and also chiral for the  $P1$  structure with Flack parameters<sup>[8]</sup> of 0.013(9) (293 K), 0.000(3) (250 K), 0.009(2) (150 K), 0.006(2) (110 K), and 0.008(7) (83 K). No solvent molecules were located in any of the structures. The tetraphenylborate anions are disordered in the  $Cc$  structures measured at 293 K, and 250 K and the  $Pc$  structures at 150 K and 110 K. There is no observed disorder in the  $\text{BPh}_4^-$  counteranion at 83 K. Figure S11 shows the degree of occupational disorder in the  $\text{BPh}_4^-$  anions at each given temperature.

## SUPPORTING INFORMATION

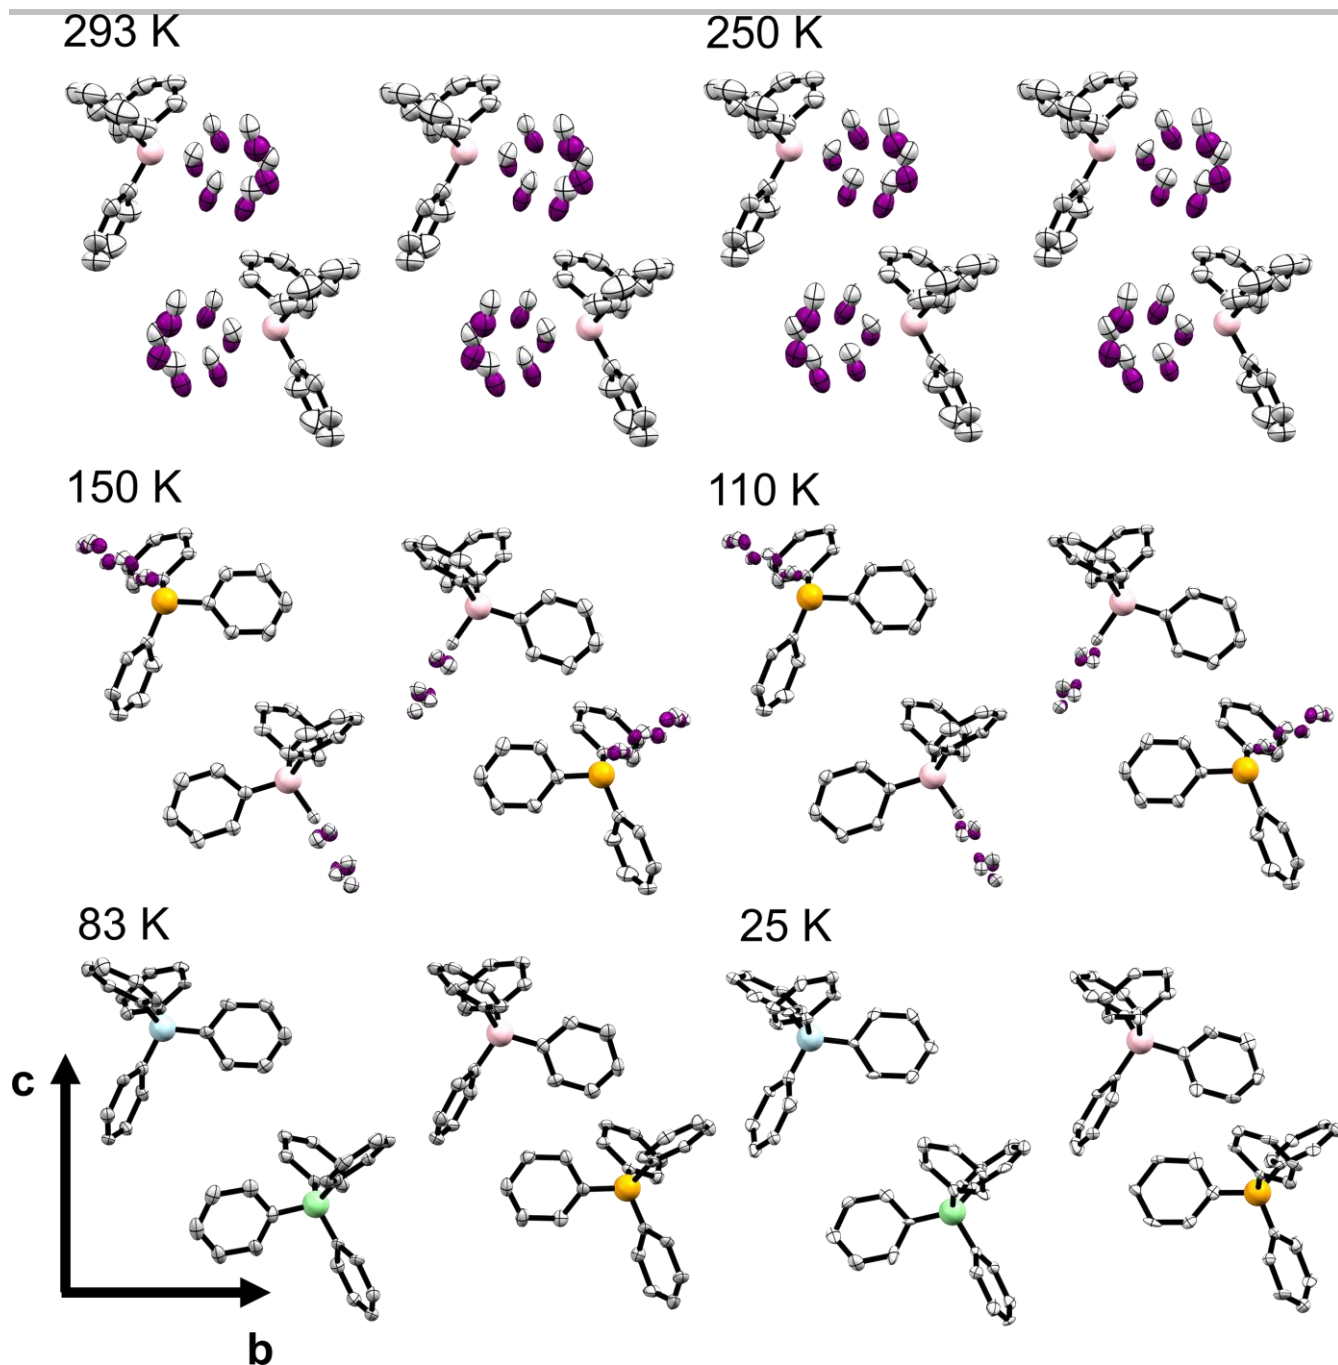

**Figure S11:** Unit cell content of the tetraphenylborate counteranion  $\text{BPh}_4^-$  viewed along the  $a$  axis with respect to the  $Cc$  cell with the other structures oriented the same way for comparison. The degree of disorder on the phenyl rings across the listed temperature range is highlighted with purple ellipsoids. Structures are shown with 50% probability ellipsoids with the  $\text{Mn}^{3+}$  chelated cations and hydrogen atoms omitted for clarity.



## SUPPORTING INFORMATION

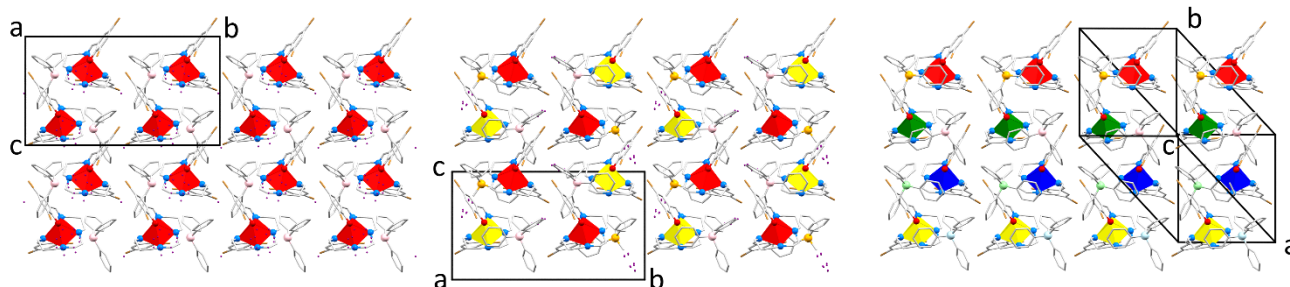

**Figure S12:** Packing of the unit cell along the a axis for the Cc cell of complex 1, [Mn(3,5-diBr-sal)<sub>2</sub>]<sub>323</sub>]BPh<sub>4</sub> measured at left: 250 K, middle: 110 K, right: 83 K with the Mn<sup>3+</sup> complex cation shown in a polyhedral environment with N<sub>4</sub>O<sub>2</sub><sup>2-</sup> donor atoms and boron atom in the tetraphenylborate counteranion shown as ball and stick figures.

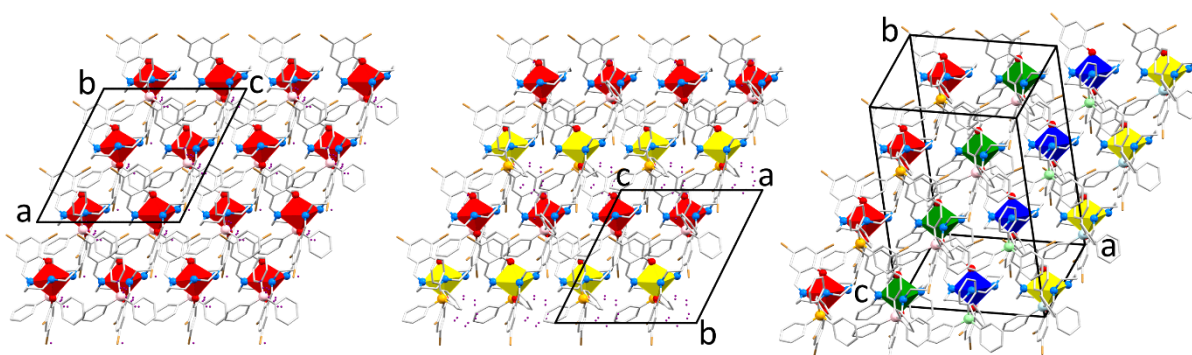

**Figure S13:** Packing of the unit cell along the b axis for the Cc cell of complex 1, [Mn(3,5-diBr-sal)<sub>2</sub>]<sub>323</sub>]BPh<sub>4</sub> measured at left: 250 K, middle: 110 K, right: 83 K with the Mn<sup>3+</sup> complex cation shown in a polyhedral environment with N<sub>4</sub>O<sub>2</sub><sup>2-</sup> donor atoms and boron atom in the tetraphenylborate counteranion shown as ball and stick figures.

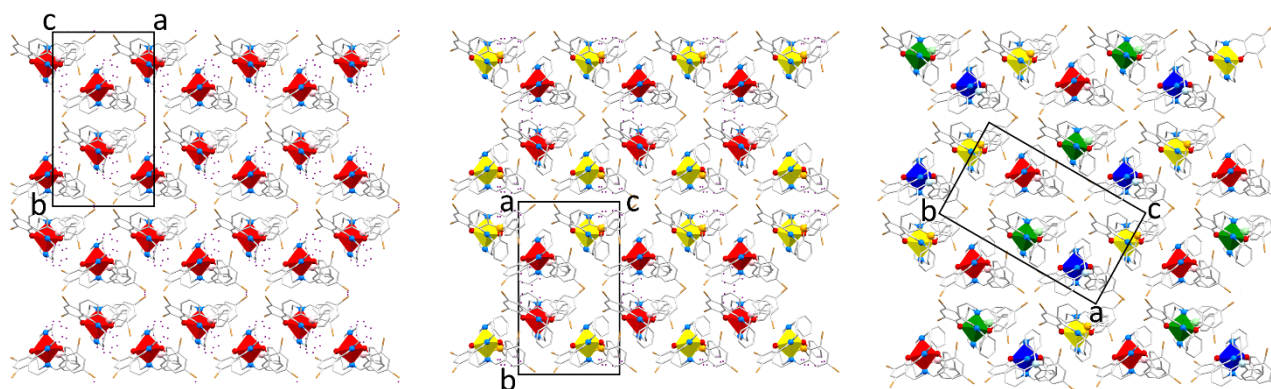

**Figure S14:** Packing of the unit cell along the c axis for the Cc cell of complex 1, [Mn(3,5-diBr-sal)<sub>2</sub>]<sub>323</sub>]BPh<sub>4</sub> measured at left: 250 K, middle: 110 K, right: 83 K with the Mn<sup>3+</sup> complex cation shown in a polyhedral environment with N<sub>4</sub>O<sub>2</sub><sup>2-</sup> donor atoms and boron atom in the tetraphenylborate counteranion shown as ball and stick figures.



## SUPPORTING INFORMATION

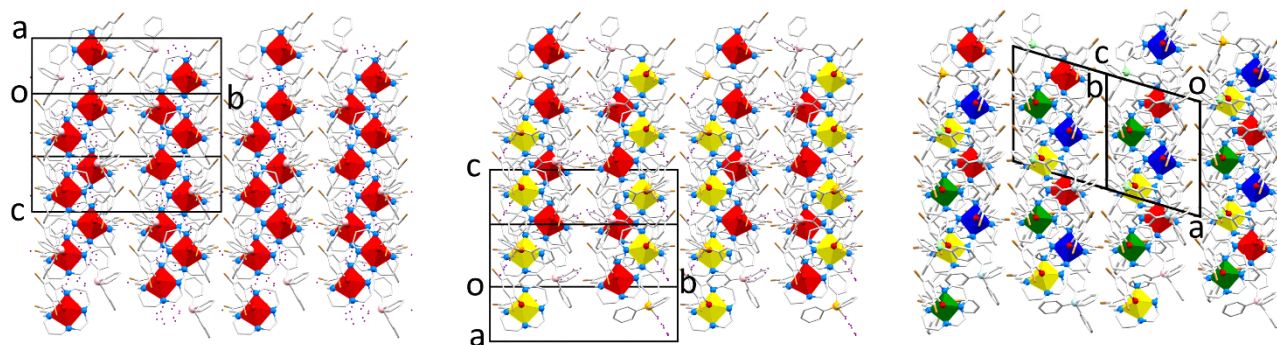

**Figure S15:** Packing of the unit cell along the  $a^*$  axis for the  $Cc$  cell of complex **1**,  $[\text{Mn}(3,5\text{-diBr-sal})_2\text{323}]\text{BPh}_4$  measured at left: 250 K, middle: 110 K, right: 83 K with the  $\text{Mn}^{3+}$  complex cation shown in a polyhedral environment with  $\text{N}_4\text{O}_2^{2-}$  donor atoms and boron atom in the tetraphenylborate counteranion shown as ball and stick figures.

In the packing arrangement of each structure measured at 250 K, 110 K and 83 K, the spin state of the  $[\text{Mn}^{\text{III}}\text{L}]^+$  complex cation is colour coded by red and yellow ( $S = 2$ ) and blue and green ( $S = 1$ ), Figure S12-S15. The spin crossover behaviour is concluded to be associated with the symmetry breaking event going from  $Pc \rightarrow P1$  and as the monoclinic axis changes direction, this phase transition is reconstructive, without a group-subgroup relationship between the two phases as seen by the striped orders of  $[\text{Mn}^{\text{III}}\text{L}]^+$  complex cations in Figure S12-S15. The phase transition is therefore first order and is reversible, since upon heating, the high temperature phase is recovered above 90 K. The presence of hysteresis in the  $\chi_M T$  versus  $T$  is directly related to the reconstructive nature of the phase transition associated with the large structural reorganization in complex **1**.

## SUPPORTING INFORMATION

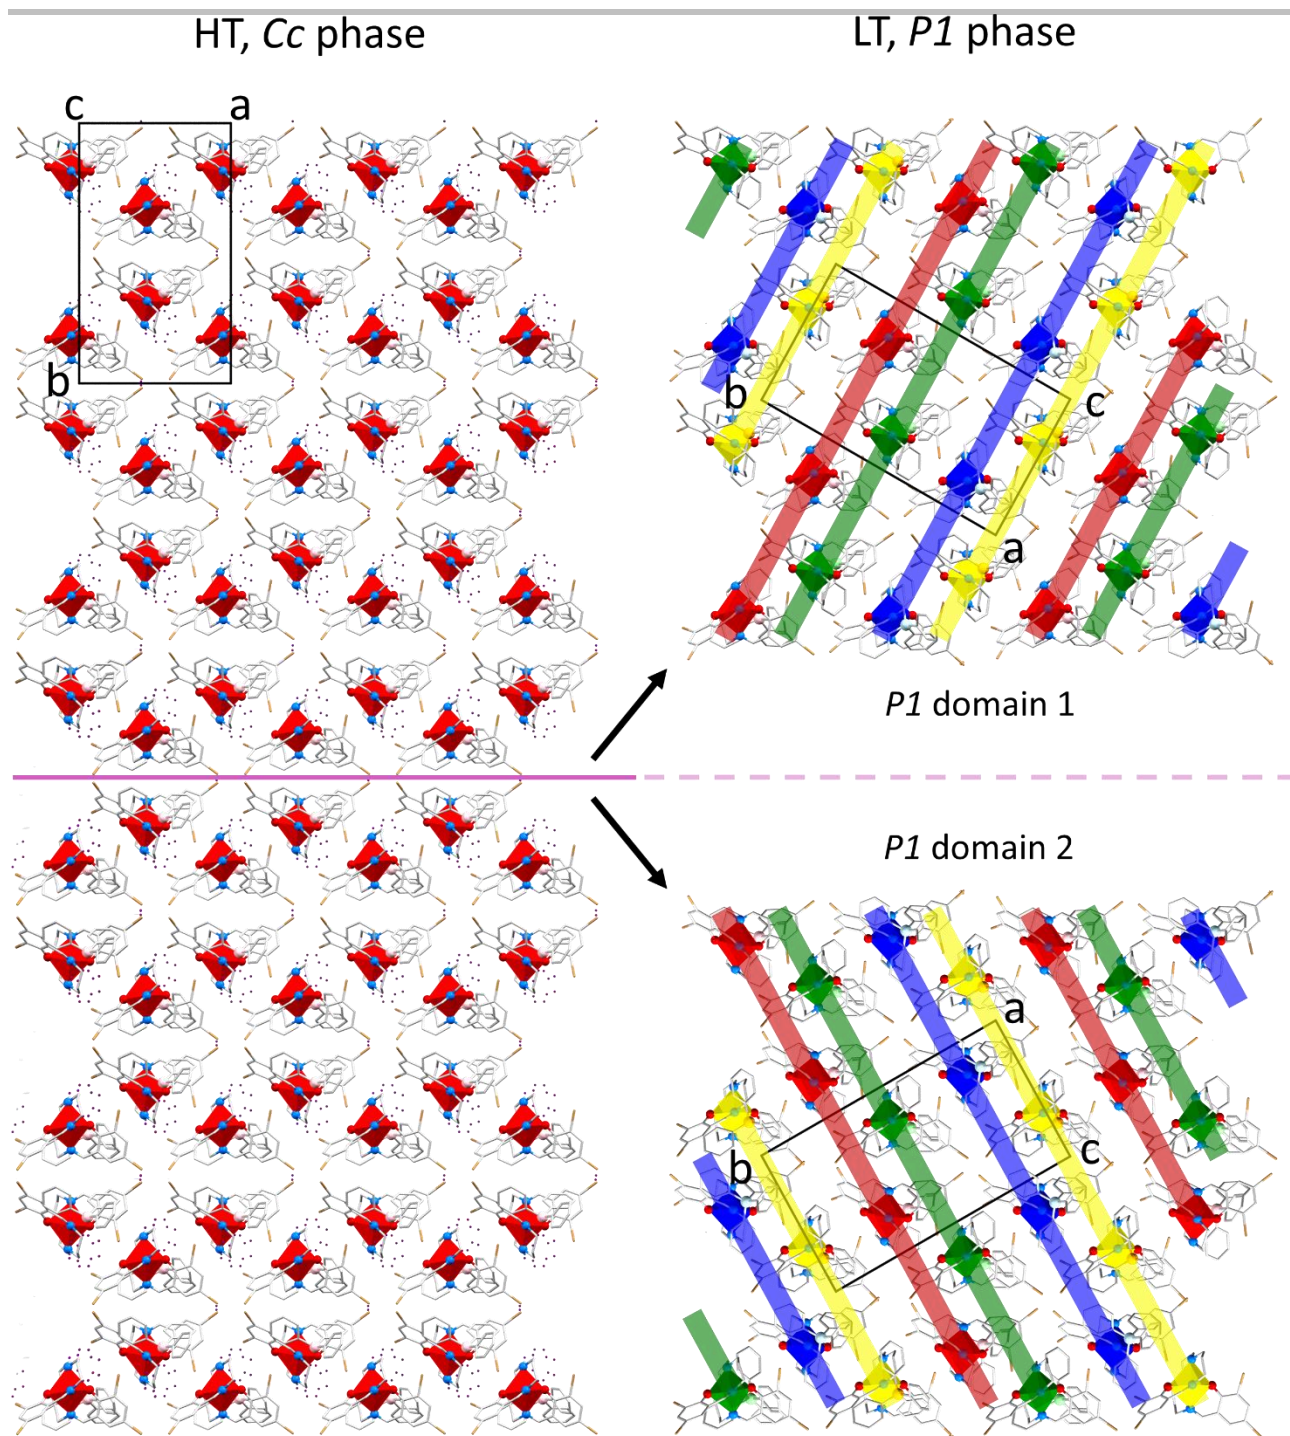

**Figure S16:** Due to the loss of the monoclinic axis, no more perpendicular to (a,c), two ferroelastic domains can form in the  $P1$  phase. The relative molecular packing between the domains are related by the symmetry plane.

## SUPPORTING INFORMATION

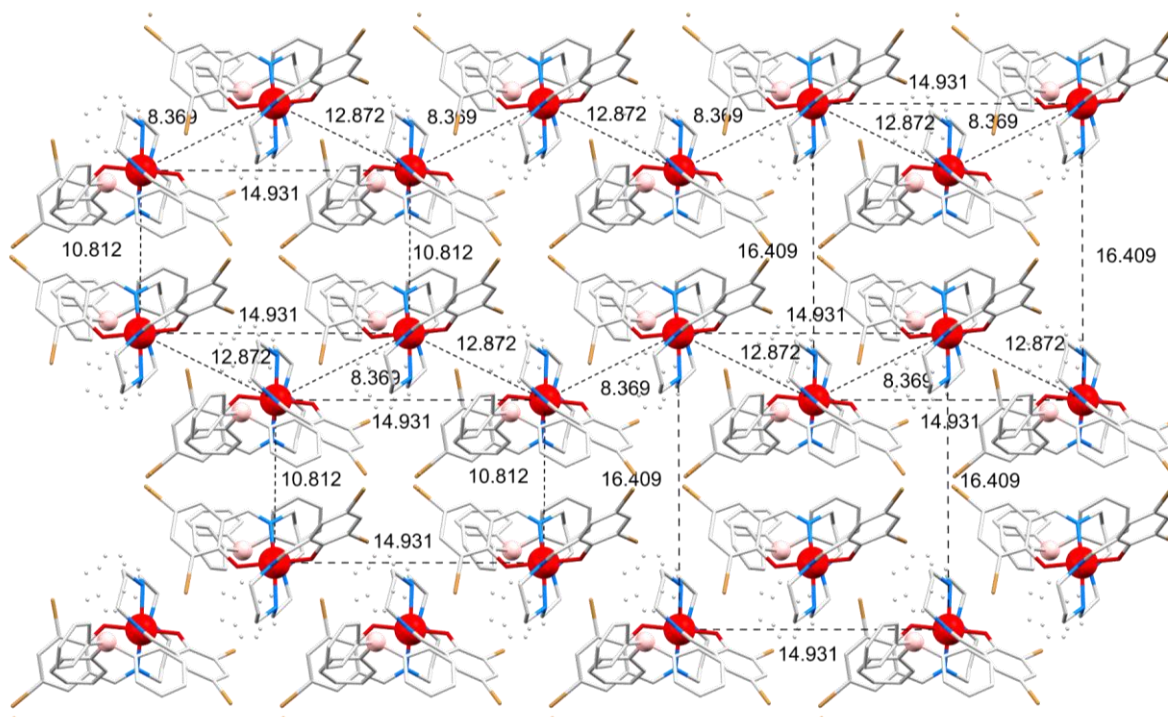

**Figure S17:** Measured distance between  $\text{Mn}^{3+}$  complex cations at 250 K viewed along the  $c$  axis for the  $Cc$  cell of complex 1,  $[\text{Mn}(3,5\text{-diBr-sal})_2\text{323}]\text{BPh}_4$  represented by capped sticks except  $\text{Mn}^{3+}$  atoms and boron atoms in the tetraphenylborate anions shown as ball and stick figures.

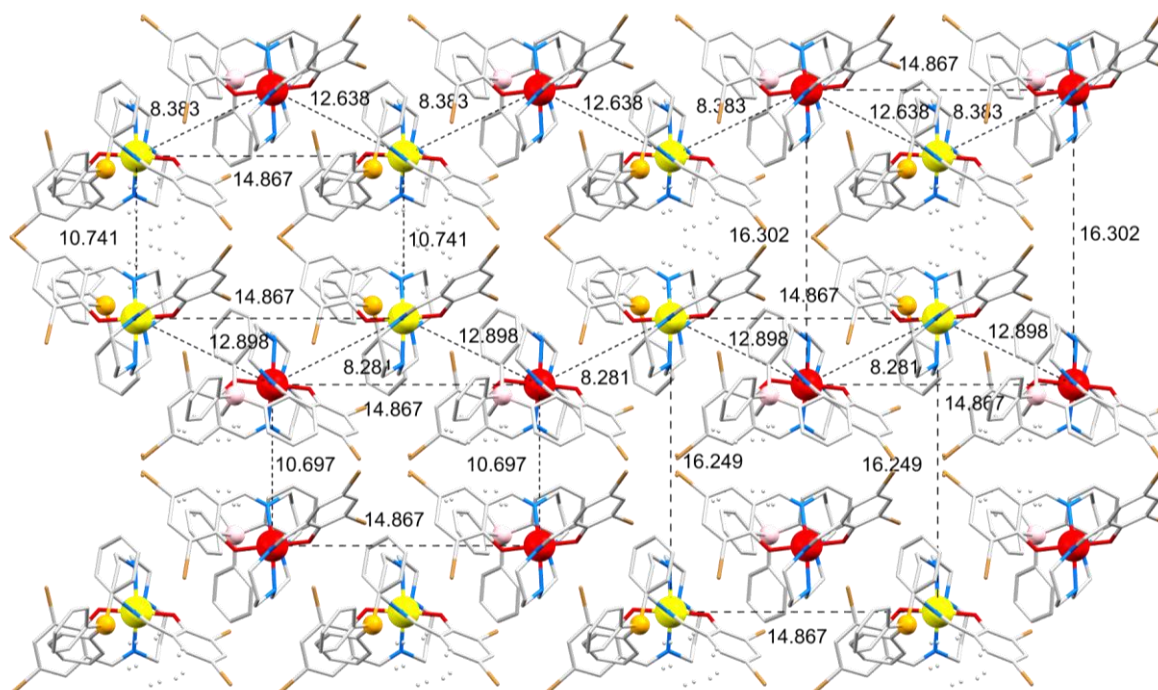

**Figure S18:** Measured distance between  $\text{Mn}^{3+}$  complex cations at 110 K viewed along the  $c$  axis for the  $Cc$  cell of complex 1,  $[\text{Mn}(3,5\text{-diBr-sal})_2\text{323}]\text{BPh}_4$  represented by capped sticks except  $\text{Mn}^{3+}$  atoms and boron atoms in the tetraphenylborate anions shown as ball and stick figures.



## SUPPORTING INFORMATION

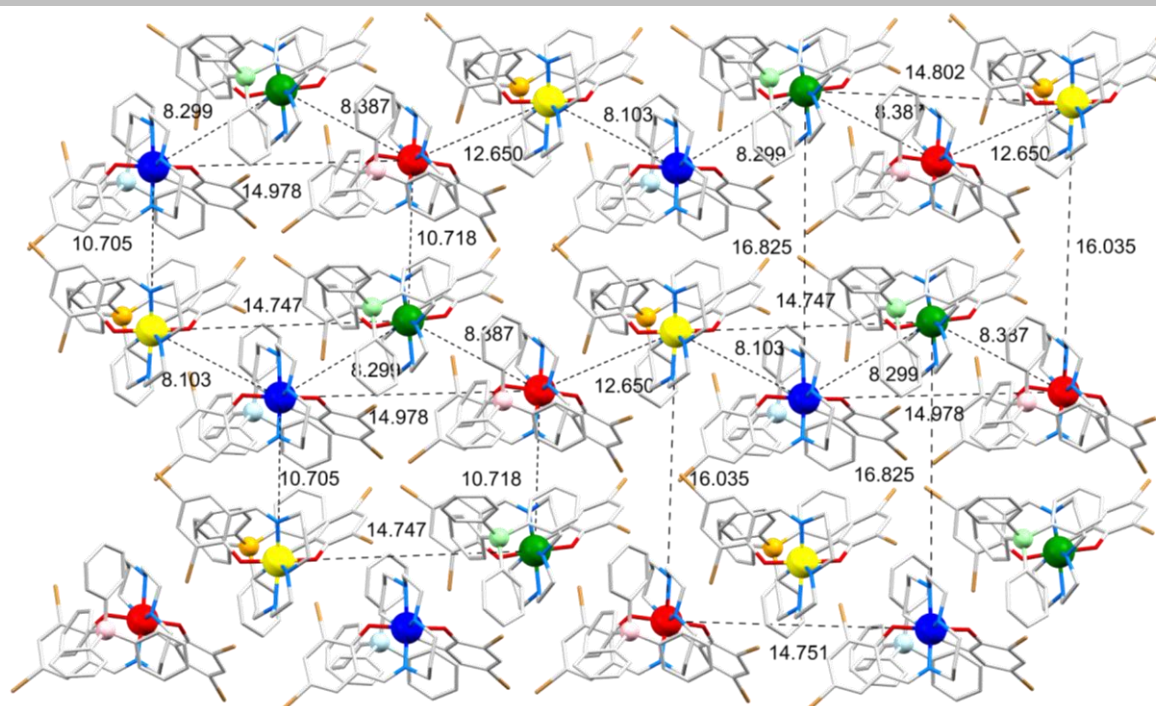

**Figure S19:** Measured distance between  $\text{Mn}^{3+}$  complex cations at 83 K viewed along the  $c$  axis for the  $Cc$  cell of complex 1,  $[\text{Mn}(3,5\text{-diBr-sal})_2\text{323}]\text{BPh}_4$  represented by capped sticks except  $\text{Mn}^{3+}$  atoms and boron atoms in the tetraphenylborate anions shown as ball and stick figures.

The measured distances between the  $\text{Mn}^{3+}$  complex cations in the HT (250 K) and INT (110 K) structures do not differ significantly from each other. However, for the LT (83 K) structure, the distance between the two  $S = 1$  LS  $\text{Mn}^{3+}$  complex cations (green and blue) change slightly as opposed to the HT (250 K) and INT (110 K) when comparing the intermolecular distances between the  $\text{Mn}^{3+}$  cations in the structures in the chain running along the  $c$  axis of the HT structure.

## SUPPORTING INFORMATION

## 3.3 Specific intermolecular interactions of complex 1

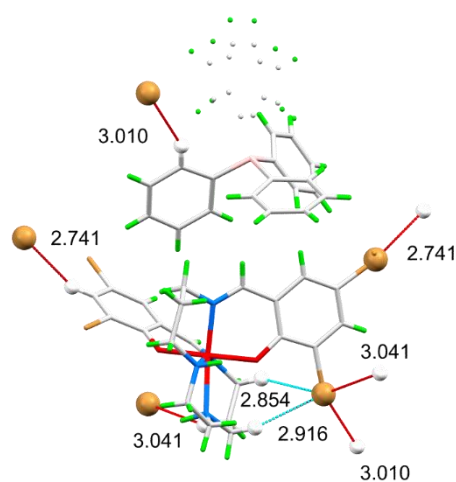

**Figure S20:** View of weak interactions between the asymmetric unit of  $[\text{MnL}]^+$  cation and tetraphenylborate anion of complex **1** at 250 K shown with capped sticks except atoms involved in weak hydrogen bonding which are represented with ball and stick figures. Hydrogen atoms not involved in hydrogen bonding are highlighted in green.

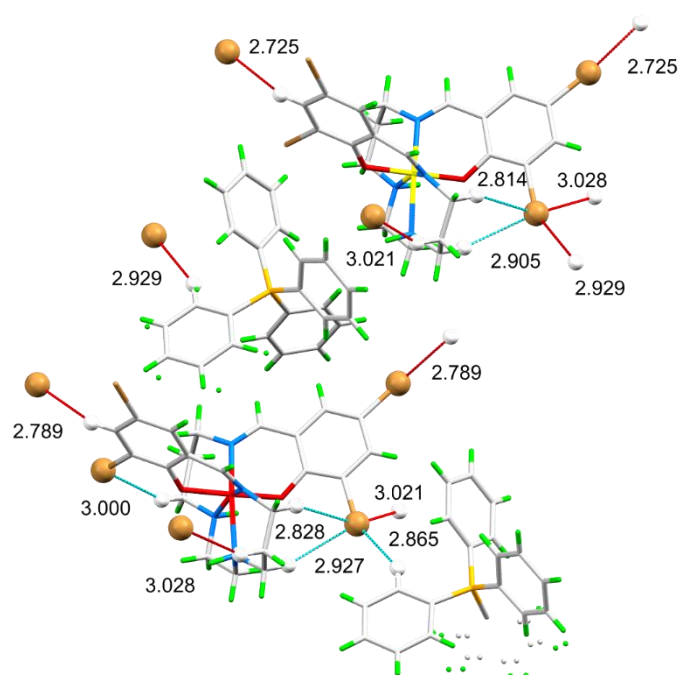

**Figure S21:** View of weak interactions between the asymmetric unit of  $[\text{MnL}]^+$  cations and tetraphenylborate anions of complex **1** at 110 K shown with capped sticks except atoms involved in weak hydrogen bonding which are represented with ball and stick figures. Hydrogen atoms not involved in hydrogen bonding are highlighted in green.

## SUPPORTING INFORMATION

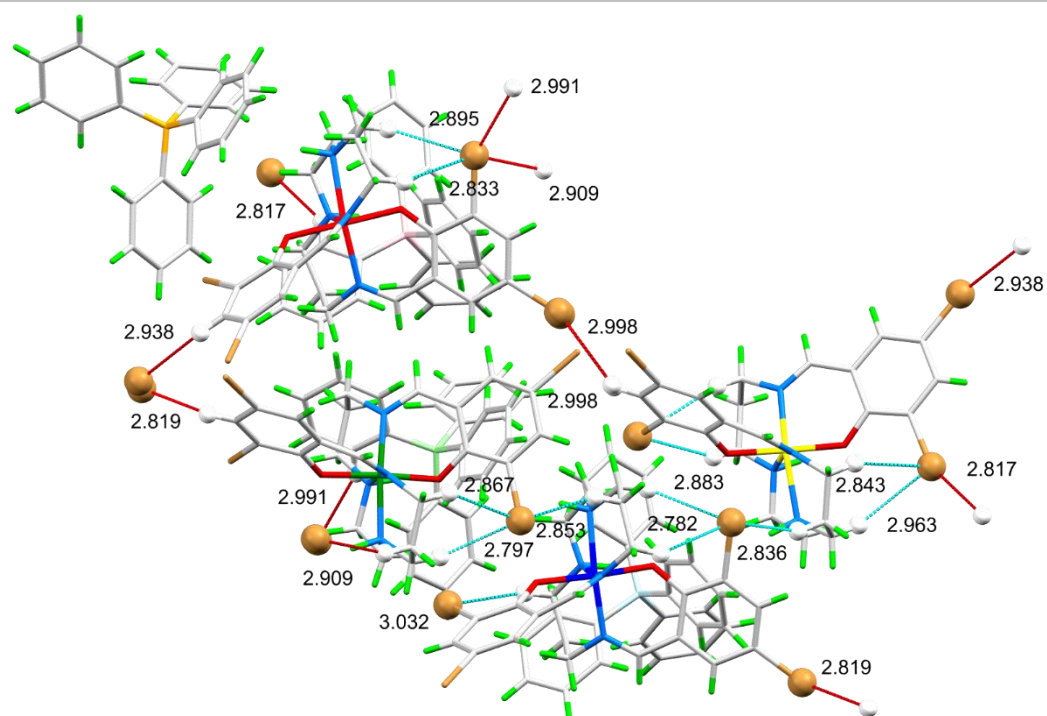

**Figure S22:** View of weak interactions between the asymmetric unit of  $[\text{MnL}]^+$  cations and tetraphenylborate anions of complex **1** at 83 K shown with capped sticks except atoms involved in weak hydrogen bonding which are represented with ball and stick figures. Hydrogen atoms not involved in hydrogen bonding are highlighted in green.

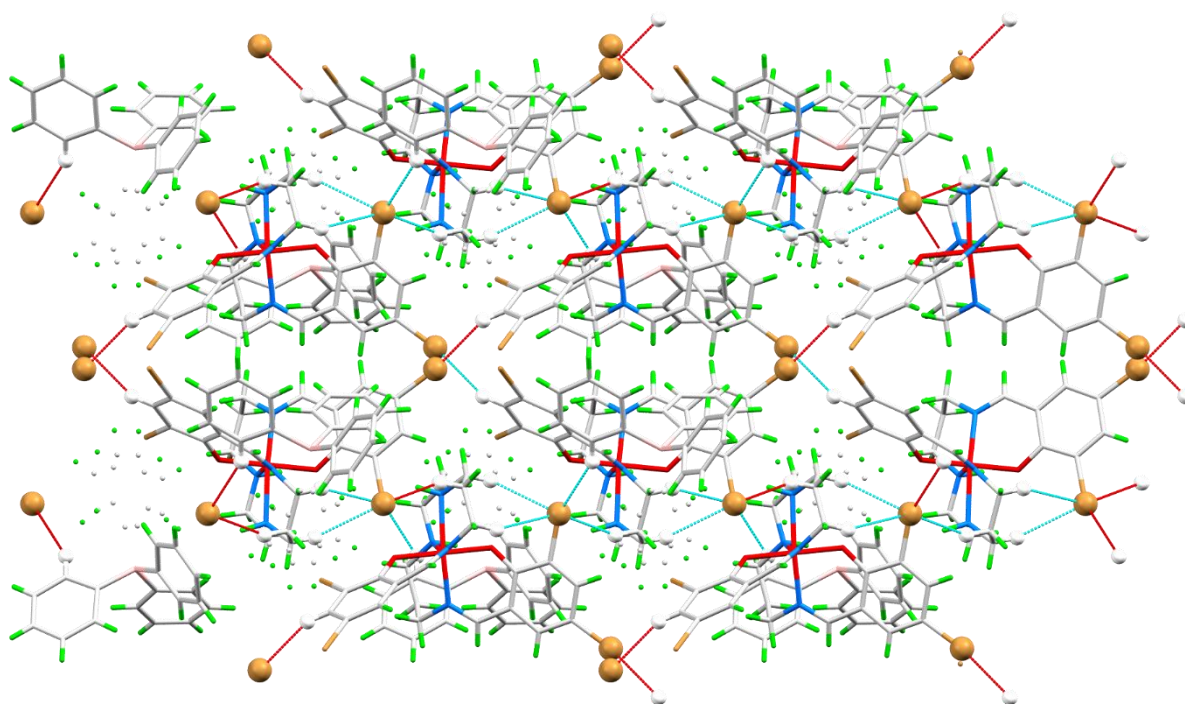

**Figure S23:** View of packing arrangement with weak interactions between  $[\text{MnL}]^+$  cations and tetraphenylborate anions of complex **1** highlighted with blue dashed lines at 250 K. Atoms not involved in hydrogen bonding are shown with capped sticks and atoms involved in weak hydrogen bonding are represented with ball and stick figures. Hydrogen atoms not involved in hydrogen bonding are highlighted in green.

## SUPPORTING INFORMATION

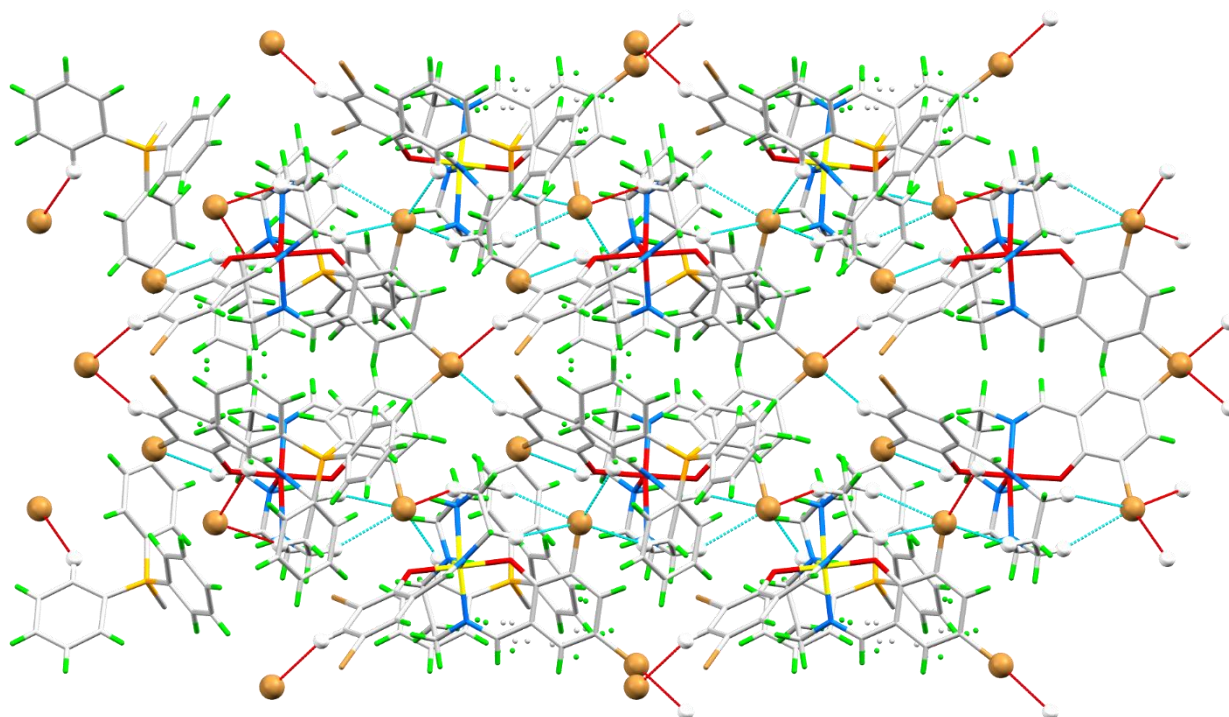

**Figure S24:** View of packing arrangement with weak interactions between  $[\text{MnL}]^+$  cations and tetraphenylborate anions of complex 1 highlighted with blue dashed lines at 110 K. Atoms not involved in hydrogen bonding are shown with capped sticks and atoms involved in weak hydrogen bonding are represented with ball and stick figures. Hydrogen atoms not involved in hydrogen bonding are highlighted in green.

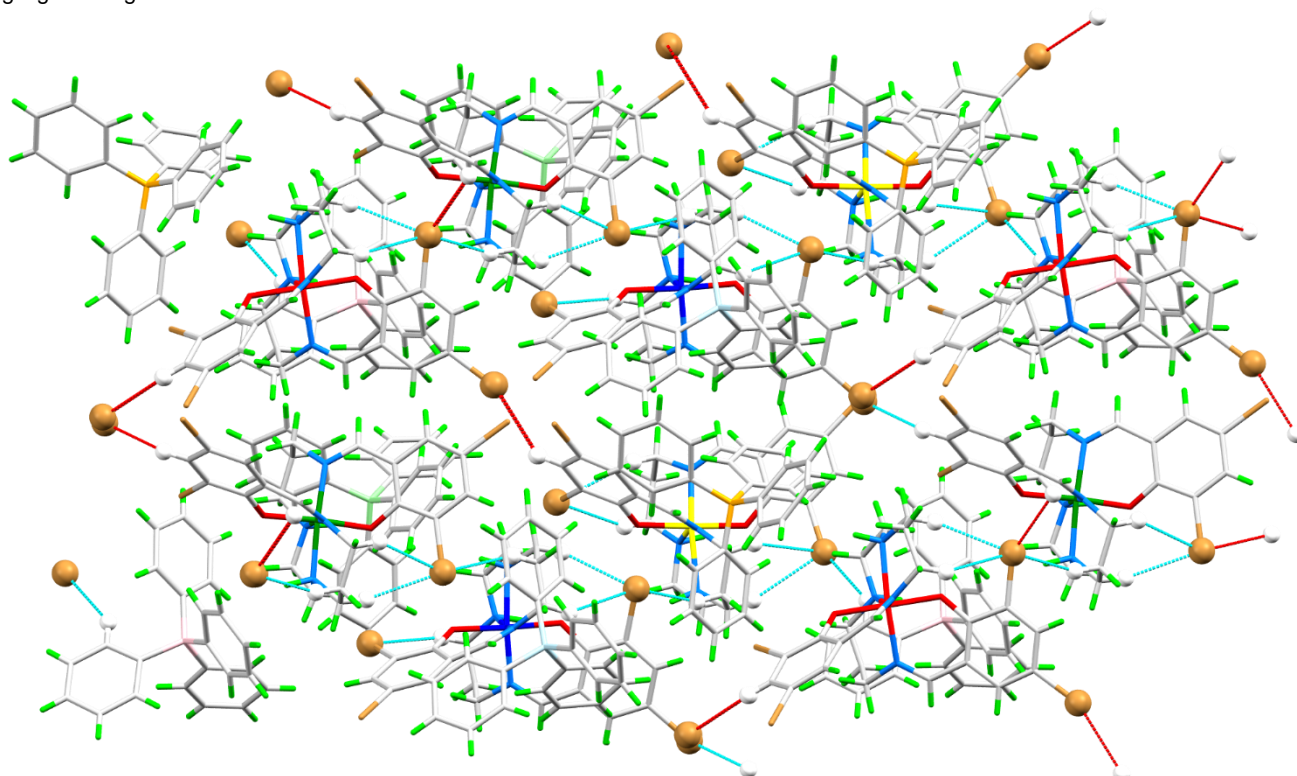

**Figure S25:** View of packing arrangement with weak interactions between  $[\text{MnL}]^+$  cations and tetraphenylborate anions of complex 1 highlighted with blue dashed lines at 83 K. Atoms not involved in hydrogen bonding are shown with capped sticks and atoms involved in weak hydrogen bonding are represented with ball and stick figures. Hydrogen atoms not involved in hydrogen bonding are highlighted in green.



## SUPPORTING INFORMATION

## 3.4 Hirshfeld surface mapping

The Hirshfeld surfaces are mapped with  $d_{\text{norm}}$ , and 2D fingerprint plots were generated using CrystalExplorer 17.5.<sup>[9]</sup> The graphical plot uses a red-white-blue colour scheme for the molecular Hirshfeld surfaces. The red highlights on the Hirshfeld surfaces show contacts shorter than the van der Waals distance, contacts within the van der Waals distance is shown in white and longer contacts are shown in blue.

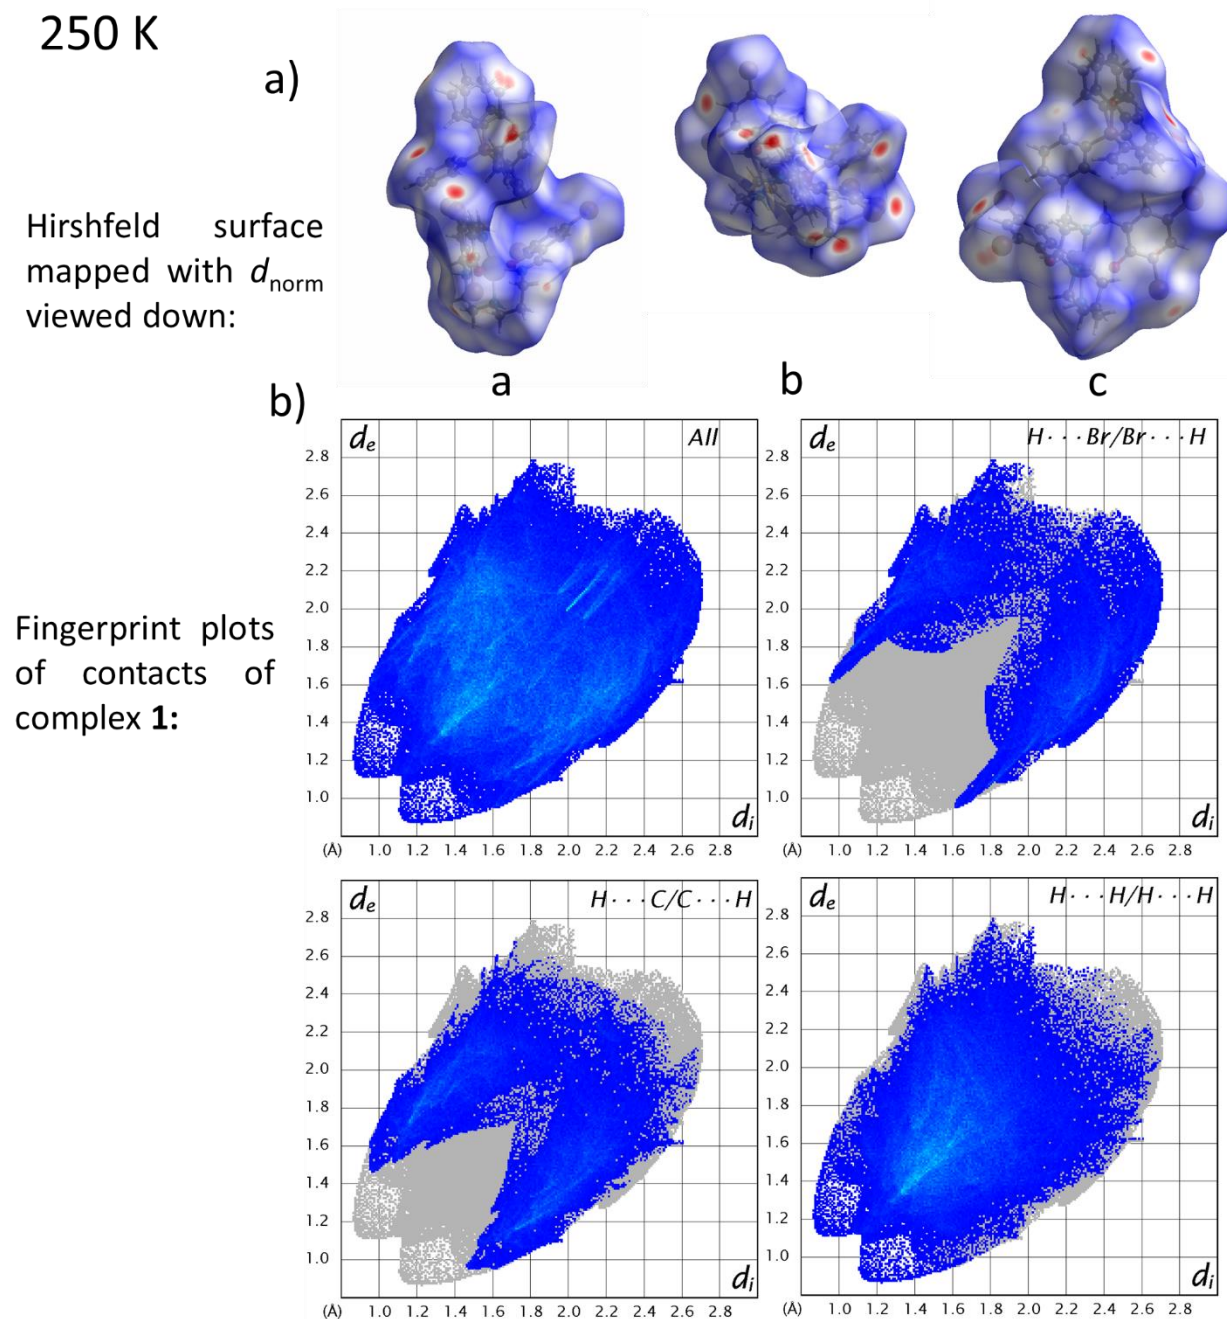

**Figure S26:** a) Hirshfeld surface mapped with  $d_{\text{norm}}$  for the structure measured at 250 K viewed along the *a*, *b* and *c* direction, b) fingerprint plots with all intermolecular interaction further resolved into the contribution of  $\text{H}\cdots\text{Br}/\text{Br}\cdots\text{H}$ ,  $\text{H}\cdots\text{C}/\text{C}\cdots\text{H}$  and  $\text{H}\cdots\text{H}/\text{H}\cdots\text{H}$  contacts of complex 1 at 250 K.



## SUPPORTING INFORMATION

110 K

Hirshfeld surface  
mapped with  $d_{\text{norm}}$   
viewed down:

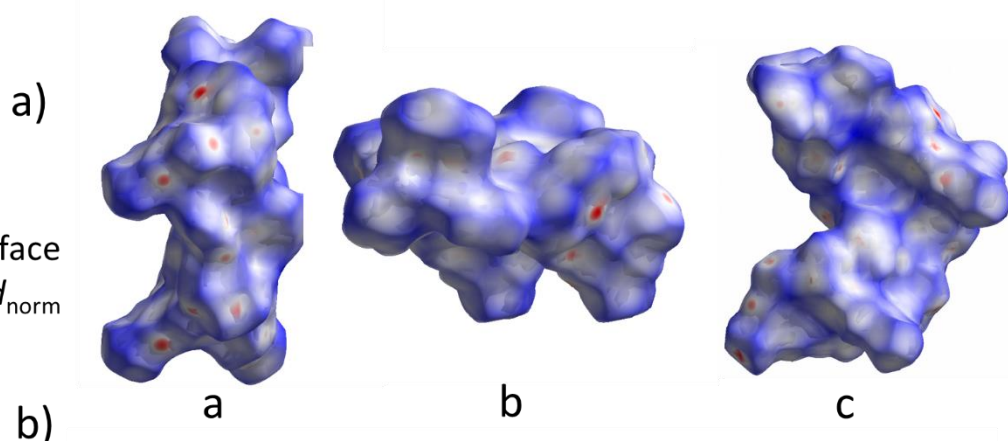

Fingerprint plots  
of contacts of  
complex 1:

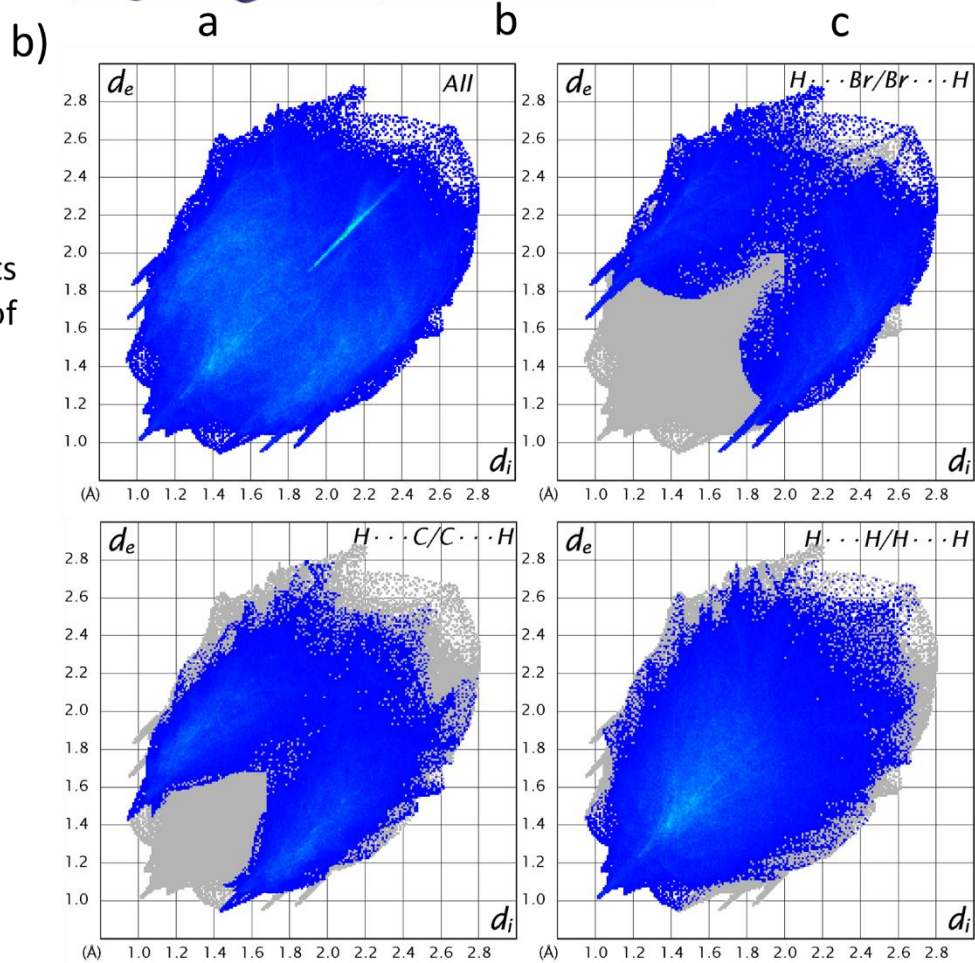

**Figure S27:** a) Hirshfeld surface mapped with  $d_{\text{norm}}$  for the structure measured at 110 K viewed along the *a*, *b* and *c* direction, b) fingerprint plots with all intermolecular interaction further resolved into the contribution of  $H \cdots Br/Br \cdots H$ ,  $H \cdots C/C \cdots H$  and  $H \cdots H/H \cdots H$  contacts of complex 1 at 110 K.

## SUPPORTING INFORMATION

83 K

Hirshfeld surface mapped with  $d_{\text{norm}}$  viewed down:

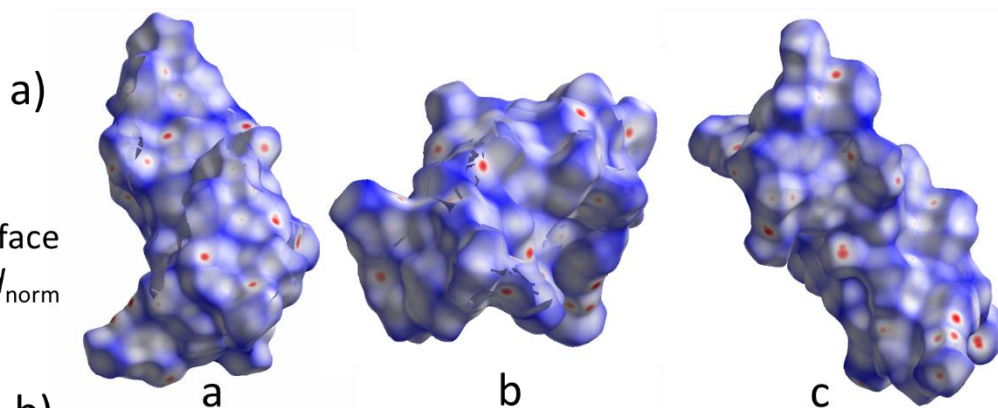

Fingerprint plots of contacts of complex **1**:

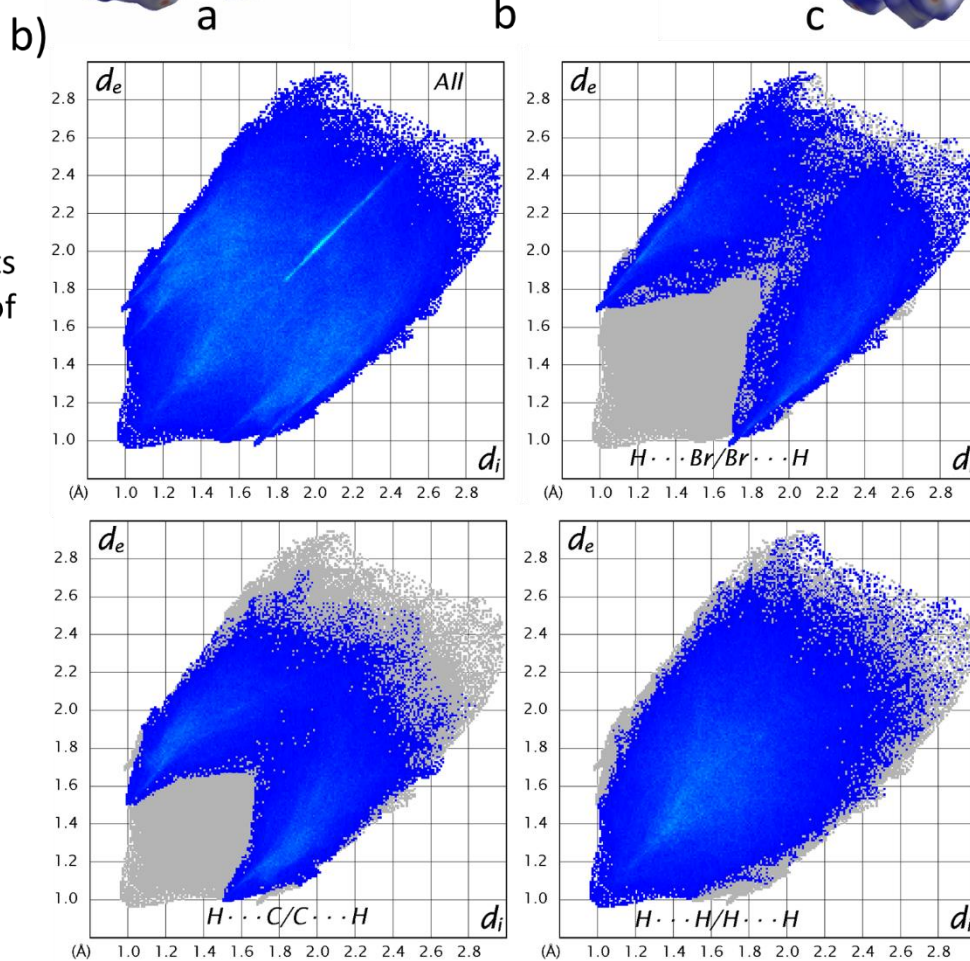

**Figure S28:** a) Hirshfeld surface mapped with  $d_{\text{norm}}$  for the structure measured at 83 K viewed along the *a*, *b* and *c* direction, b) fingerprint plots with all intermolecular interaction further resolved into the contribution of  $H \cdots Br/Br \cdots H$ ,  $H \cdots C/C \cdots H$  and  $H \cdots H/H \cdots H$  contacts of complex **1** at 83 K.

## SUPPORTING INFORMATION

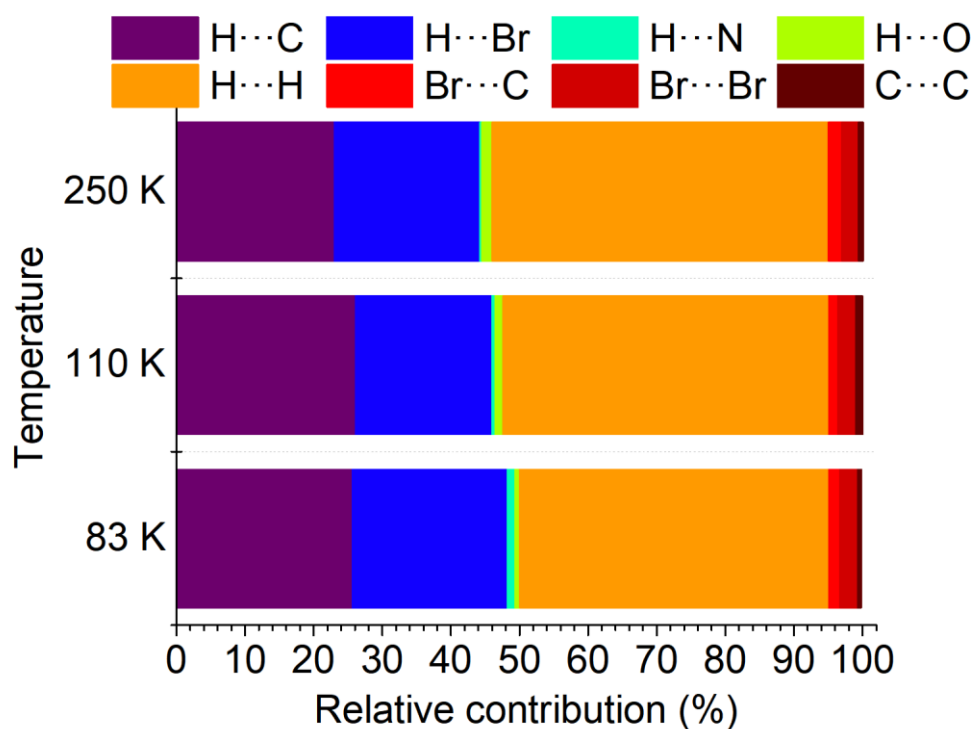

**Figure S29:** Relative contributions to the Hirshfeld surface area of different intermolecular interactions for the HT (250 K), INT (110 K) and LT (83 K) structures.

The dominating interactions originate from H...C, H...Br, and H...H between the hydrogen atoms on the tetraphenylborate anion and the bromide groups on the phenyl ring on the salicylaldehyde motif as well as hydrogen and carbon atoms in the backbone of Mn<sup>3+</sup> chelated complex. Those interactions appear as distinct spikes in the 2D fingerprint plot.

## SUPPORTING INFORMATION

## 3.5 Variable temperature single crystal X-ray diffraction

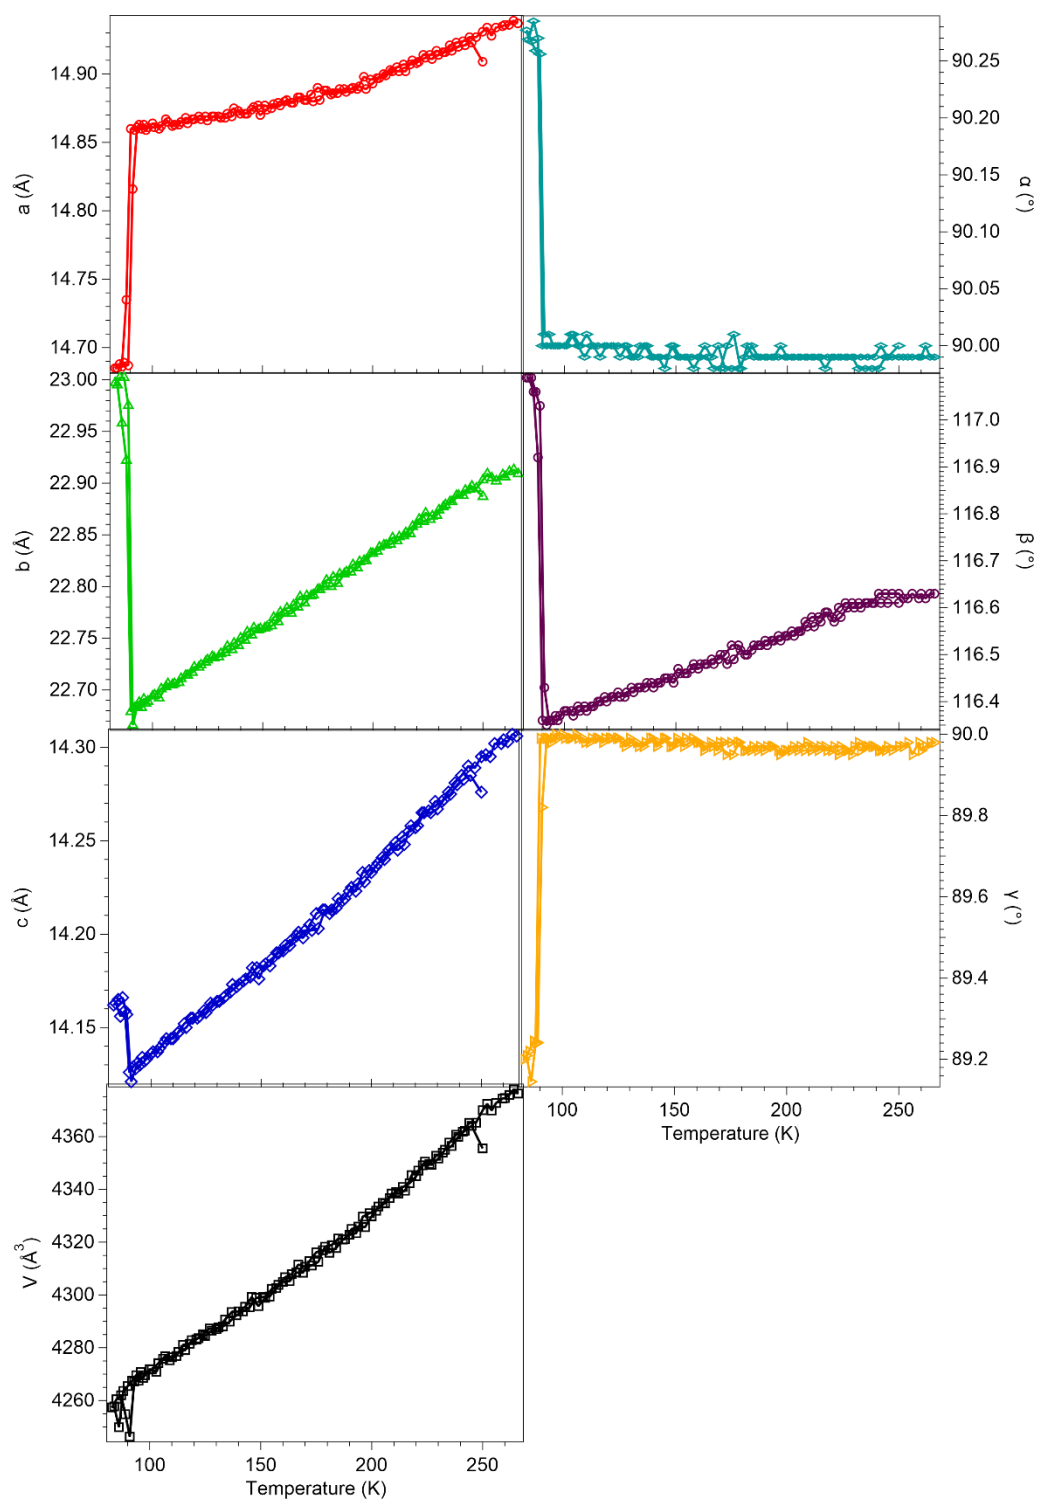

**Figure S30:** Variable temperature X-ray diffraction of unit cell parameters,  $V$ ,  $a$ ,  $b$ ,  $c$ ,  $\alpha$ ,  $\beta$  and  $\gamma$ , measured on a single crystal of complex 1 showing the cooling and heating sequence and changes in unit cell parameters from 83-266 K.

## SUPPORTING INFORMATION

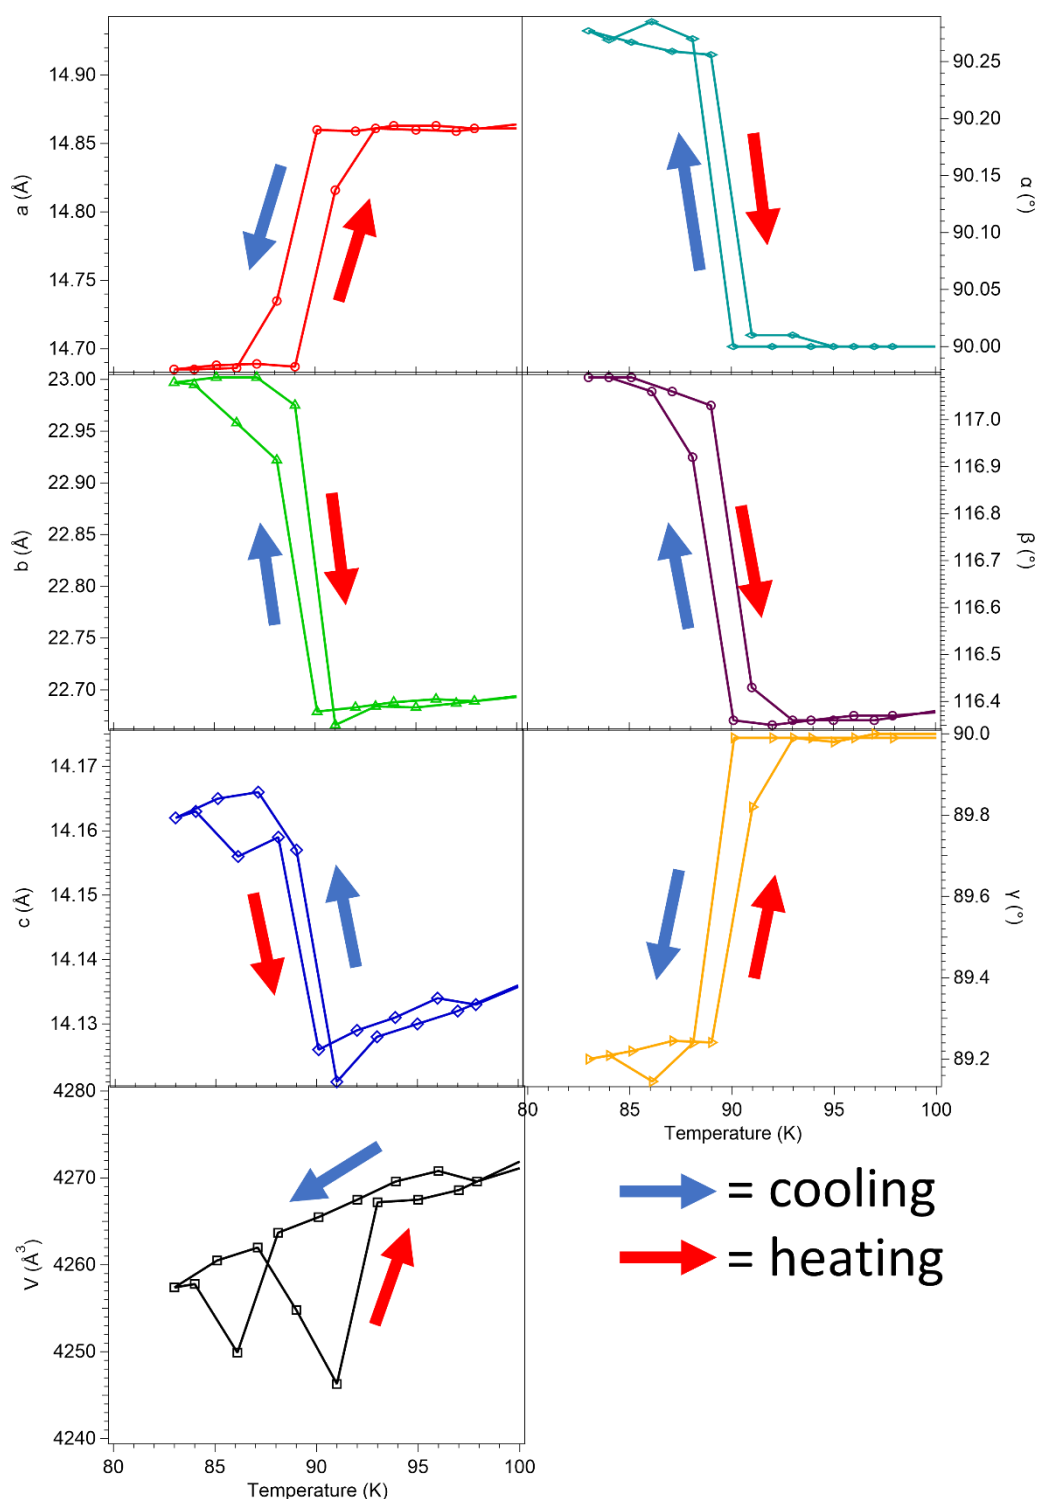

**Figure S31:** Variable temperature X-ray diffraction of unit cell parameters,  $V$ ,  $a$ ,  $b$ ,  $c$ ,  $\alpha$ ,  $\beta$  and  $\gamma$ , measured on a single crystal of complex 1 showing the cooling and heating sequence and changes in unit cell parameters from 80-100 K with arrows indicating the heating (red) and cooling mode (blue) of the data points.

The change in lattice parameters versus temperature, Figure S31 and S32 were measured from 250 K to 84 K in cooling mode and 83 K to 266 K in heating mode. The measurements were performed in 3 K per step from 250 to 101 K and in 2 K per step from 98 K to 84 K in cooling mode. In heating mode, the measurements were performed in 2 K per step from 83 K to 97 K and in 3 K per step from 100 K to 266 K. The data was integrated with respect to the  $Cc$  cell at 266 K.

## SUPPORTING INFORMATION

## 3.6 Reconstructed planes and superstructure reflections

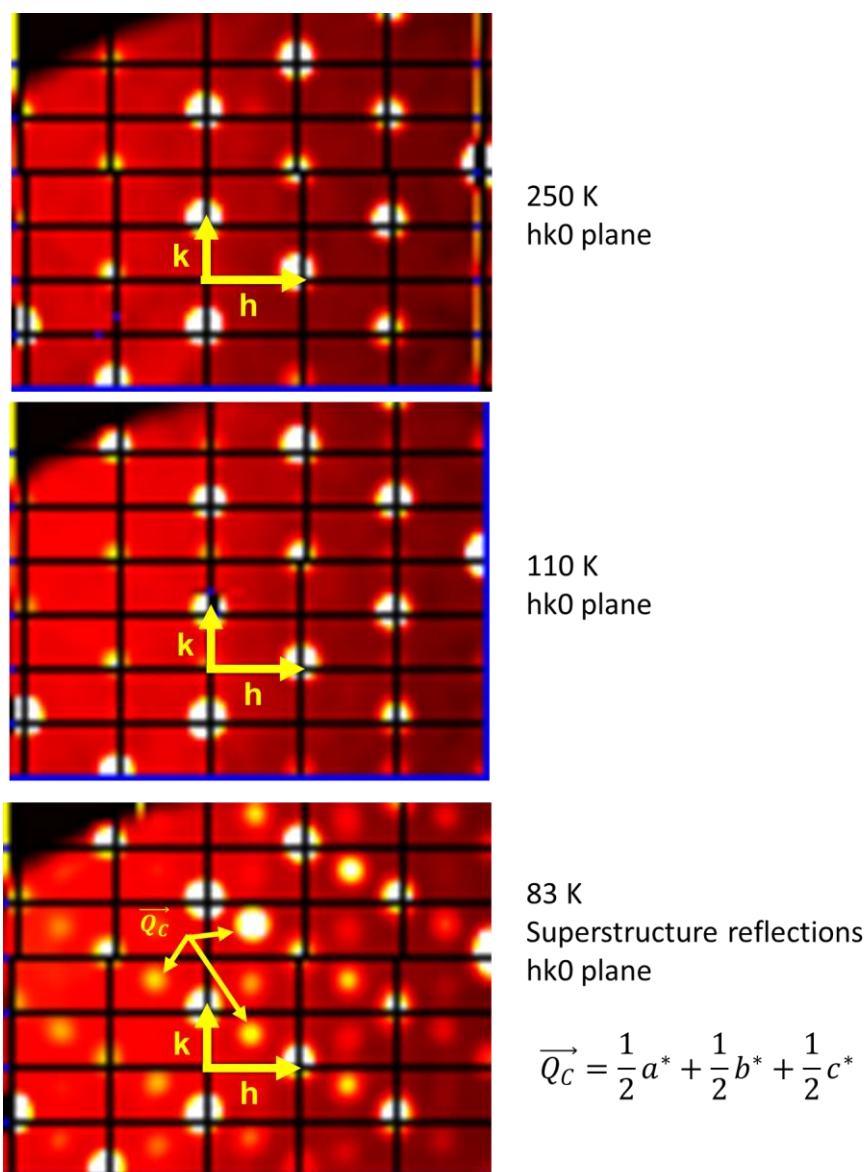

**Figure S32:** Representative precession images (hk0 plane) obtained from SCXRD of complex 1 collected at 250 K, 110 K and 83 K.



## SUPPORTING INFORMATION

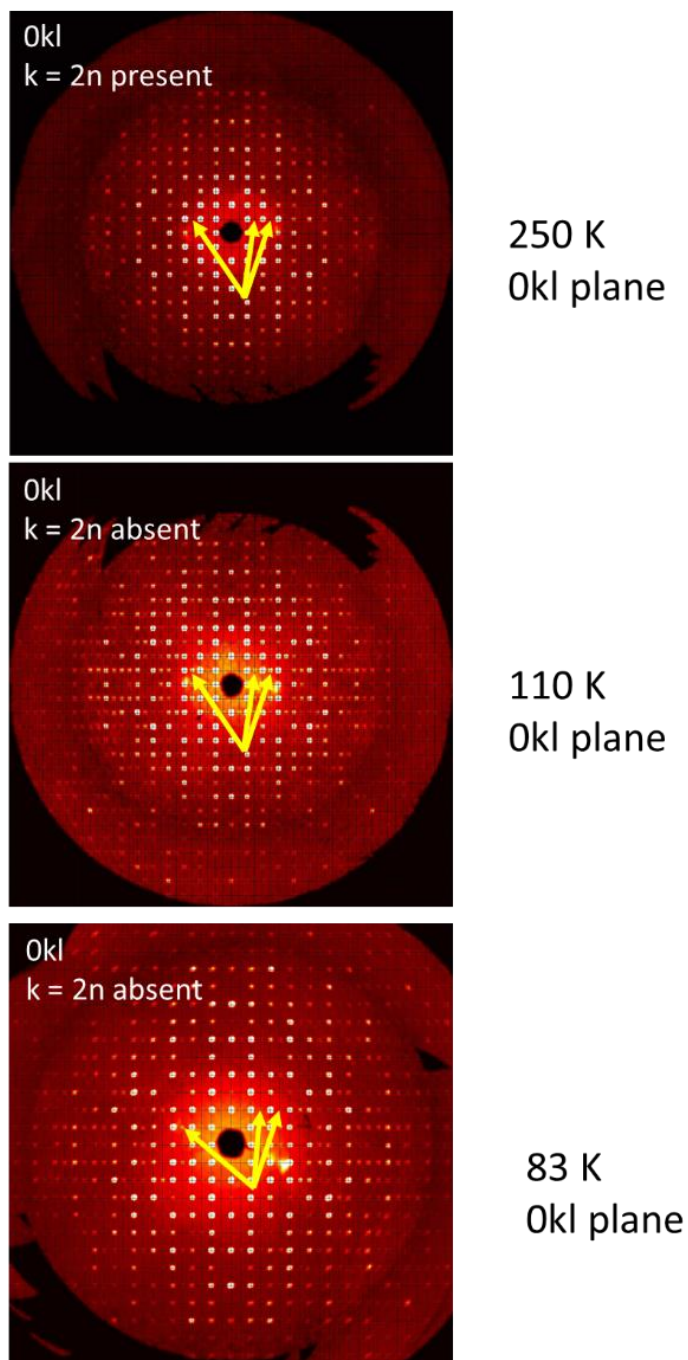

**Figure S33:** Representative precession images (0kl plane) was obtained from SCXRD of complex 1 collected at 250 K, 110 K and 83 K.

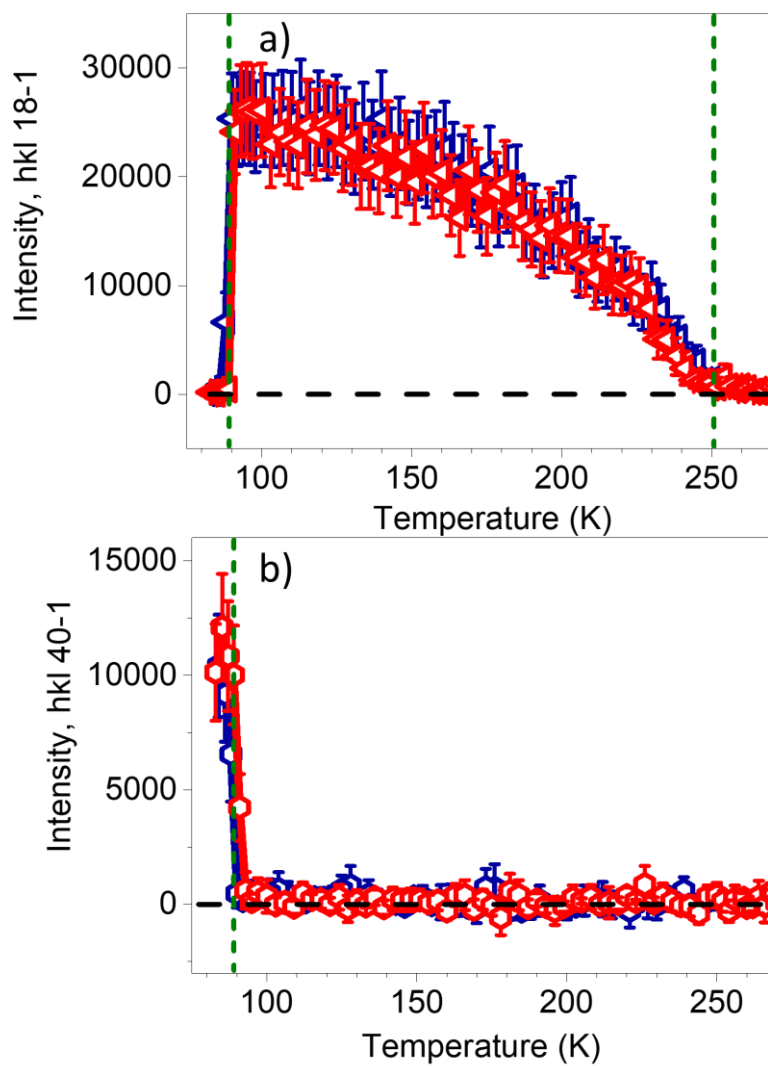

**Figure S34:** Appearance of superstructure reflections with error bars going from  $Cc \rightarrow Pc$  for hkl = 18-1 and  $Pc \rightarrow P1$  for hkl = 40-1.



## SUPPORTING INFORMATION

## 3.7 Twin domains

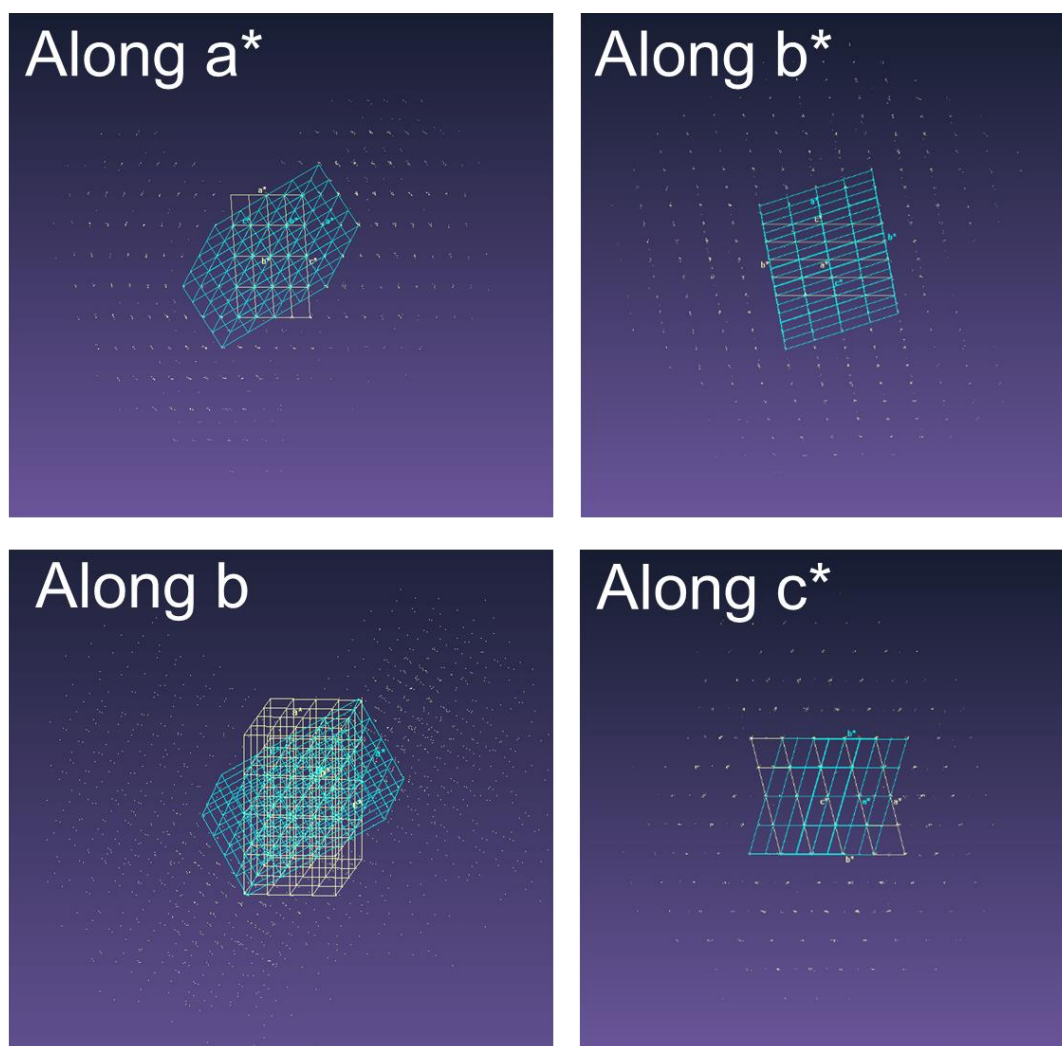

**Figure S35:** View of reciprocal space in various orientations of the unit cell at 83 K where presence of a second component illustrates the twin domain formed in the  $P1$  structure.

## SUPPORTING INFORMATION

## 4. Resonant ultrasound spectroscopy

## 4.1 Strain analysis from unit cell parameters

Spontaneous strains associated with the two structural phase transitions have been determined using the approach and equations as previously set out.<sup>[10]</sup> The parent structure has space group *Cc* and the two derivative structures have space groups *Pc* and *P1*, with group-subgroup sequences as *Cc* → *Pc* (co-elastic) and *Cc* → *P1* (improper ferroelastic). Values of reference parameters  $a_0$ ,  $b_0$ ,  $c_0$ ,  $\alpha_0$  ( $=90^\circ$ ),  $\beta_0^*$  ( $=180 - \beta_0$ ),  $\gamma_0$  ( $=90^\circ$ ) for the *Cc* structure were obtained by extrapolation of a linear fit to measured parameters in the temperature interval 266 K to 250 K, Figure S36. A linear extrapolation does not allow for the requirement that the slope of lattice parameters of crystalline materials must tend to zero as  $T \rightarrow 0$ , but there are insufficient data for the *Cc* structure to allow fitting with a coth function as would normally be used for analysis of strains at low temperatures.<sup>[11]</sup>

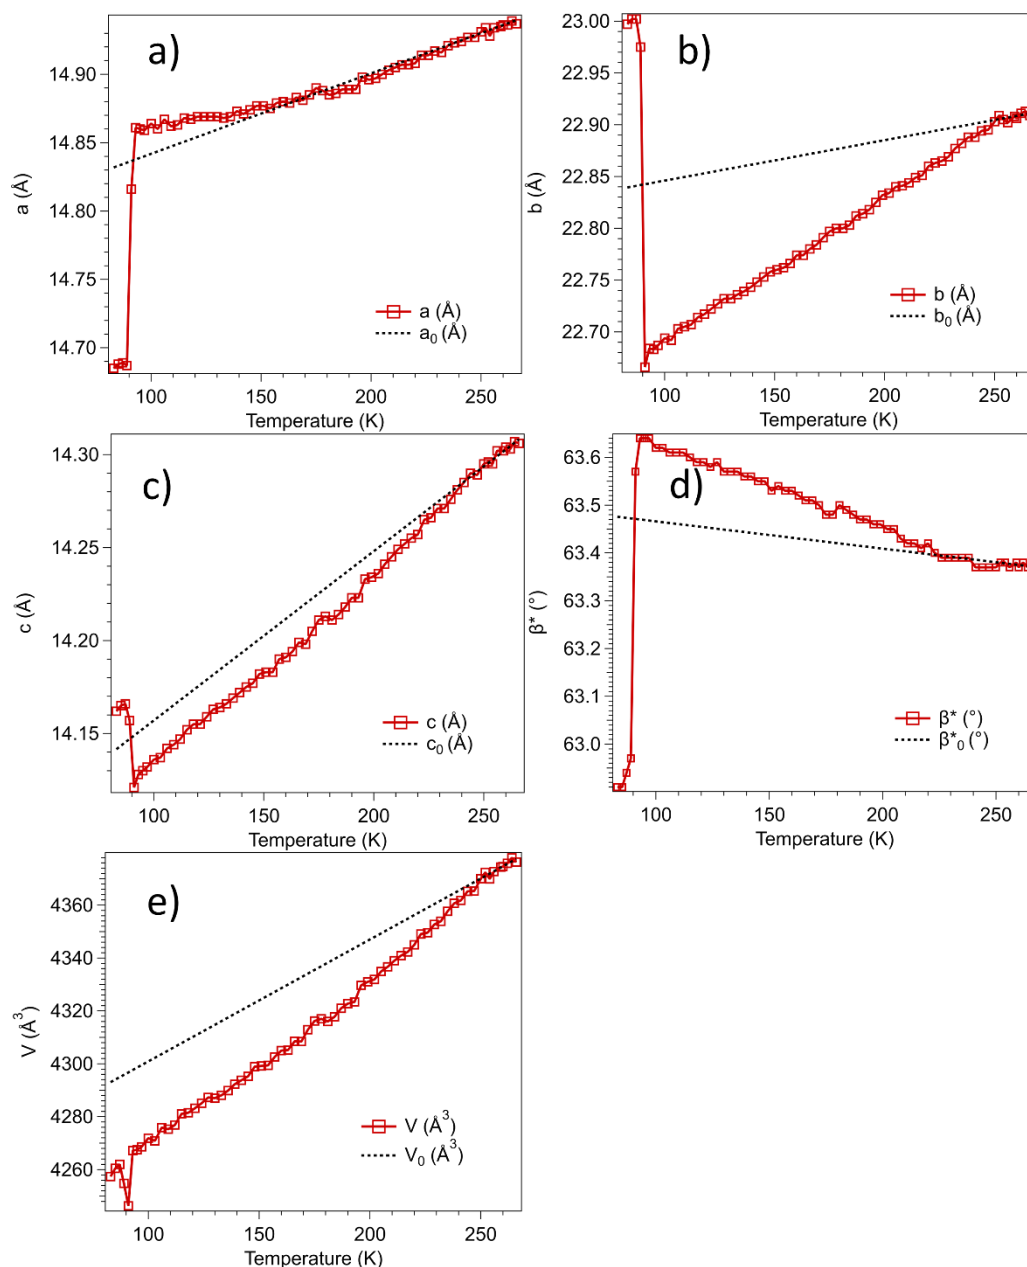

**Figure S36:** Linear fits to lattice parameter data in the temperature interval 266 to 83 K and the extrapolations to lower temperatures (dotted lines) represent variations of reference parameters  $a_0$ ,  $b_0$ ,  $c_0$ ,  $\alpha_0$  ( $=90^\circ$ ),  $\beta_0$ ,  $\gamma_0$  ( $=90^\circ$ ) in calculations of the spontaneous strains associated with *Cc* → *Pc* and *Cc* → *P1* transitions. Reference values of the unit cell volume,  $V_0$ , were obtained in the same way.

## SUPPORTING INFORMATION

Individual strain components,  $e_i$ ,  $i = 1, 2, 3, 5$  were calculated for  $Cc \rightarrow Pc$  ( $e_4 = e_6 = 0$ ) according to the following equations:

$$e_1 = \frac{a - a_0}{a_0} \quad (S1)$$

$$e_2 = \frac{b - b_0}{b_0} \quad (S2)$$

$$e_3 = \frac{c \sin \beta - c_0 \sin \beta_0}{c_0 \sin \beta_0} \quad (S3)$$

$$e_5 = \left( \frac{c \cos \beta}{c_0 \sin \beta_0} - \frac{a \cos \beta_0}{a_0 \sin \beta_0} \right) \quad (S4)$$

Individual strain components,  $e_i$ ,  $i = 1-6$  were calculated for  $Cc \rightarrow P1$  according to

$$e_1 = \frac{a}{a_0} \sin(\gamma) - 1 \quad (S5)$$

$$e_2 = \frac{b}{b_0} - 1 \quad (S6)$$

$$e_3 = \frac{c \sin(\alpha) \sin(\beta^*)}{c_0 \sin(\beta_0^*)} - 1 \quad (S7)$$

$$e_4 = \left( \frac{c \cos(\alpha)}{c_0 \sin(\beta_0^*)} + \frac{a \cos(\beta_0^*) \cos(\gamma)}{a_0 \sin(\beta_0^*)} \right) \quad (S8)$$

$$e_5 = \left( \frac{a \sin(\gamma) \cos(\beta_0^*)}{a_0 \sin(\beta_0^*)} + \frac{c \sin(\alpha) \cos(\beta^*)}{c_0 \sin(\beta_0^*)} \right) \quad (S9)$$

$$e_6 = \left( \frac{a}{a_0} \cos(\gamma) \right) \quad (S10)$$

Values of the volume strain,  $V_s$ , were given by

$$V_s = \frac{V - V_0}{V_0} \quad (S11)$$

The resulting strain variations are given in Figures 3a and 3b of the main text. A test of the accuracy of linear extrapolations to obtain the reference parameters is provided by comparison of values for  $V_s$  obtained directly using Equation S11 with values obtained using  $V_s = e_1 + e_2 + e_3$ , which should hold for small volume strains. As shown in Figure 3a, the two variations of  $V_s$  have the same non-linear form of temperature dependence but with different absolute values. It is safe to conclude that the strain components all have a continuous variation through the  $Cc \rightarrow Pc$  transition point and a non-linear dependence on temperature in the stability field of the  $Pc$  structure. Errors in the absolute values must increase with falling temperature, however, because of the assumption of linearity for the reference parameters. The  $Pc \rightarrow P1$  transition is clearly discontinuous, as expected given that two space groups do not have a group-subgroup relationship. In principle it should be possible to determine the transition temperature for the  $Cc \rightarrow P1$  transition by extrapolation of a fit to  $e_4$  and  $e_6$  to zero but there are insufficient data to produce a reliable result.

For each of the  $Cc \rightarrow Pc$  and  $Cc \rightarrow P1$  transitions, the lowest order terms for coupling between strains,  $e_i$ , and the driving order parameter,  $q$ , have the form  $\lambda e_i q^2$ . This leads to the expected relationships  $e_i \propto V_s \propto q^2$ .<sup>[10]</sup>

## SUPPORTING INFORMATION

## 4.2 Correlation of transition points between different measurements

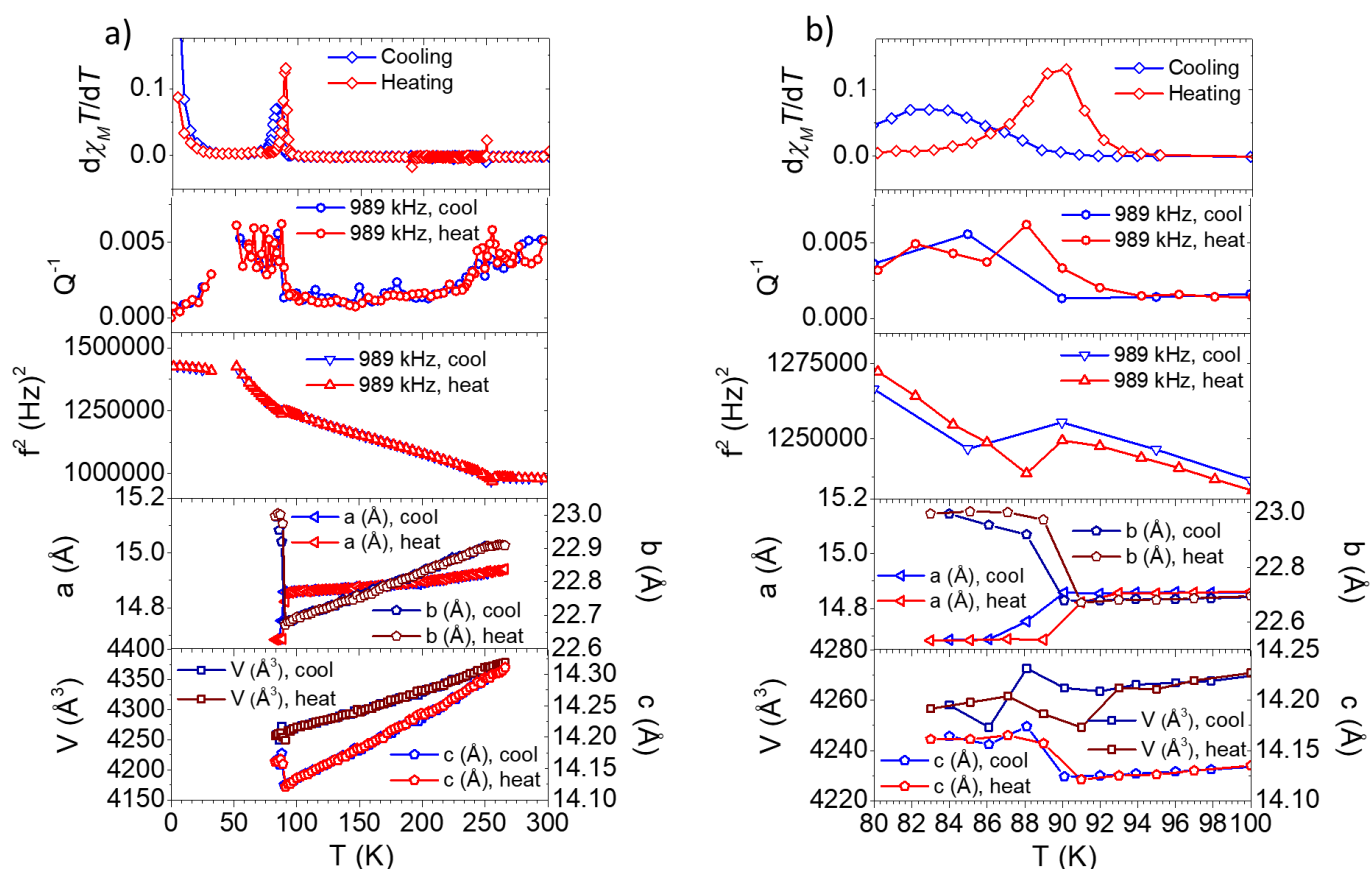

**Figure S37:** Correlation between heating and cooling modes of changes in  $d\chi_M/T$  vs  $T$  measured by SQUID magnetometry on a bulk polycrystalline sample,  $f^2$  and  $Q^{-1}$  parameters elucidated from the RUS measurement on a single crystal and the variable temperature SCXRD of unit cell parameters measured on a single crystal shown in the range a) 0 K to 300 K and b) 80 K to 100 K.

## 5. Author contributions

V.B.J. and L.C.G. carried out the experimental procedures and characterization of samples. V.B.J. was supporting in data acquisition or analysis for all the experiments undertaken in this study. E.D., S.C., X.D. and V.S.Z. performed the PPMS data acquisition of the heat capacity and data analysis. K.E. and S.F. performed the SQUID magnetometry measurements. H.M.-B. and E.T. performed the single crystal X-ray diffraction experiments and data analysis of the single crystal X-ray data. M.A.C. collected the resonant ultrasound spectroscopy spectra and performed parts of the data analysis of RUS spectra and strain calculations. G.G.M. conceived and supervised the study. V.B.J., V.S.Z., M.A.C., E.C. and G.G.M. contributed to the main writing of the manuscript. All other authors made smaller contributions to the reading and writing of the manuscript.

## 6. References

- [1] J. C. Lashley, M. F. Hundley, A. Migliori, J. L. Sarrao, P. G. Pagliuso, T. W. Darling, M. Jaime, J. C. Cooley, W. L. Hults, L. Morales, D. J. Thoma, J. L. Smith, J. Boerio-Goates, B. F. Woodfield, G. R. Stewart, R. A. Fisher, N. E. Phillips, *Cryogenics* **2003**, *43*, 369-378.
- [2] CrysAlisPro v1.171.36-38, Agilent Technologies XRD Products, Oxfordshire.
- [3] a) G. Sheldrick, *Acta Crystallogr. Sect. A: Found. Crystallogr.* **2008**, *64*, 112-122; b) G. Sheldrick, *Acta Crystallogr. Sect. A: Found. Crystallogr.* **2015**, *71*, 3-8.
- [4] G. Sheldrick, *Acta Crystallogr. Sect. C: Cryst. Struct. Commun.* **2015**, *71*, 3-8.
- [5] O. V. Dolomanov, L. J. Bourhis, R. J. Gildea, J. A. K. Howard, H. Puschmann, *J. Appl. Crystallogr.* **2009**, *42*, 339-341.
- [6] R. E. A. McKnight, M. A. Carpenter, T. W. Darling, A. Buckley, P. A. Taylor, *Am. Mineral.* **2007**, *92*, 1665-1672.
- [7] R. Ketkaew, Y. Tantirungrotechai, D. J. Harding, P. Harding, M. Marchivie, OctaDist: A tool for calculating distortion parameters in coordination complexes. <https://octadist.github.io>.
- [8] H. Flack, *Acta Crystallogr. Sect. A: Found. Crystallogr.* **1983**, *39*, 876-881.
- [9] M. J. Turner, J. J. McKinnon, S. K. Wolff, D. J. Grimwood, P. R. Spackman, D. Jayatilaka, M. A. Spackman, *CrystalExplorer17*, **2017**, University of Western Australia.
- [10] M. A. Carpenter, E. K. H. Salje, A. Graeme-Barber, *Eur. J. Mineral.* **1998**, *10*, 621-691.
- [11] a) E. K. H. Salje, B. Wruck, H. Thomas, *Z. Phys. B: Condens. Matter* **1991**, *82*, 399-404; b) M. A. Carpenter, H.-W. Meyer, P. Sonderegeld, S. Marion, K. S. Knight, *Am. Mineral.* **2003**, *88*, 534-546.
